# Supplementary material for: Conservation of magnetite biomineralization genes in all domains of life and implications for magnetic sensing
Source: PubMed Central journal article supplement (PMC8784154; doi:10.1073/pnas.2108655119), 2022-01-10
Supplement: pnas.2108655119.sd01.pdf [file pnas.2108655119.sd01.pdf]

**Dataset S1. Gene ontologies for differentially expressed genes.** Functional annotation results for Chinook salmon (*Oncorhynchus tshawytscha*) genes differentially and more highly expressed in magnetic olfactory cells contrasted to non-magnetic cells isolated from the same tissue and having significant overrepresentation in gene ontology (GO) categories. Analyses were conducted in PANTHER, Protein Analysis Through Evolutionary Relationships, applying the built-in Benjamini-Hochberg false discovery rate (FDR  $P < 0.05$ ) to correct for multiple tests and listing all categories identified as significant per program default settings. Results are shown for GO complete categories biological process (BP), molecular function (MF), and cellular component (CC). Shading is used to depict individual GO category groupings, with sub-category hierarchy (H) indicated using a numeric scale: zero indicates the most specific sub-category assignment, and incrementally higher numbers indicates the next-broader-level within the ontology hierarchy (multiple equal hierarchies can be present). A total of 1,588 differentially expressed transcripts were matched to zebrafish protein homologs, resulting in assignment of 1,333 zebrafish ZDB-Gene identifiers to enable use of zebrafish (*Danio rerio*) as a background genome. The number observed (No. Obs.) refers to the number of DEGs that mapped to each GO category, while the number of expected genes (No. exp.) is modeled by considering the number of genes in the input file and the background contents of the zebrafish genome. Fold-enrichment (FE) is calculated by No. obs. / No. exp.

| GO | H | GO Complete                                   | No. genes<br>zebrafish<br>genome | No. obs. | No. exp. | FE   | Raw p-<br>value | FDR    |
|----|---|-----------------------------------------------|----------------------------------|----------|----------|------|-----------------|--------|
| BP | 0 | anatomical structure maturation               | 53                               | 11       | 2.38     | 4.63 | 0.0001          | 0.0392 |
|    | 1 | developmental maturation                      | 71                               | 12       | 3.18     | 3.77 | 0.0002          | 0.0486 |
|    | 1 | anatomical structure development              | 3908                             | 223      | 175.24   | 1.27 | 0.0002          | 0.0512 |
|    | 2 | developmental process                         | 4049                             | 235      | 181.56   | 1.29 | 0.0000          | 0.0301 |
|    | 0 | cell maturation                               | 50                               | 10       | 2.24     | 4.46 | 0.0002          | 0.0481 |
|    | 1 | cellular developmental process                | 2130                             | 132      | 95.51    | 1.38 | 0.0003          | 0.0498 |
|    | 2 | cellular process                              | 12019                            | 605      | 538.95   | 1.12 | 0.0001          | 0.0435 |
|    | 2 | cell differentiation                          | 2080                             | 130      | 93.27    | 1.39 | 0.0002          | 0.0462 |
|    | 0 | mitotic cell cycle                            | 295                              | 32       | 13.23    | 2.42 | 0.0000          | 0.0165 |
|    | 0 | ubiquitin-dependent protein catabolic process | 352                              | 33       | 15.78    | 2.09 | 0.0002          | 0.0508 |
|    | 1 | primary metabolic process                     | 5656                             | 317      | 253.62   | 1.25 | 0.0000          | 0.0145 |
|    | 2 | metabolic process                             | 6485                             | 348      | 290.80   | 1.20 | 0.0002          | 0.0504 |
|    | 2 | organic substance metabolic process           | 5966                             | 325      | 267.53   | 1.21 | 0.0001          | 0.0472 |
|    | 2 | nitrogen compound metabolic process           | 5198                             | 286      | 233.09   | 1.23 | 0.0002          | 0.0498 |
|    | 1 | cellular protein metabolic process            | 2801                             | 169      | 125.60   | 1.35 | 0.0001          | 0.0452 |
|    | 2 | cellular macromolecule metabolic process      | 3555                             | 206      | 159.41   | 1.29 | 0.0002          | 0.0520 |

| GO | H | GO Complete                                                    | No. genes        |          |          | FE   | Raw p-value | FDR    |
|----|---|----------------------------------------------------------------|------------------|----------|----------|------|-------------|--------|
|    |   |                                                                | zebrafish genome | No. obs. | No. exp. |      |             |        |
| 3  |   | cellular metabolic process                                     | 5582             | 306      | 250.31   | 1.22 | 0.0001      | 0.0479 |
| 0  |   | regulation of protein modification process                     | 516              | 45       | 23.14    | 1.94 | 0.0001      | 0.0405 |
| 1  |   | regulation of protein metabolic process                        | 827              | 62       | 37.08    | 1.67 | 0.0002      | 0.0513 |
| 2  |   | regulation of primary metabolic process                        | 2790             | 191      | 125.11   | 1.53 | 0.0000      | 0.0000 |
| 3  |   | regulation of metabolic process                                | 3023             | 205      | 135.56   | 1.51 | 0.0000      | 0.0000 |
| 4  |   | regulation of biological process                               | 7993             | 420      | 358.42   | 1.17 | 0.0002      | 0.0490 |
| 5  |   | biological regulation                                          | 8691             | 452      | 389.72   | 1.16 | 0.0002      | 0.0504 |
| 2  |   | regulation of nitrogen compound metabolic process              | 2741             | 184      | 122.91   | 1.50 | 0.0000      | 0.0001 |
| 1  |   | regulation of cellular metabolic process                       | 2846             | 192      | 127.62   | 1.50 | 0.0000      | 0.0000 |
| 2  |   | regulation of macromolecule metabolic process                  | 2867             | 195      | 128.56   | 1.52 | 0.0000      | 0.0000 |
| 0  |   | regulation of phosphorylation                                  | 453              | 39       | 20.31    | 1.92 | 0.0003      | 0.0488 |
| 1  |   | regulation of phosphate metabolic process                      | 482              | 41       | 21.61    | 1.90 | 0.0003      | 0.0516 |
| 2  |   | regulation of phosphorus metabolic process                     | 482              | 41       | 21.61    | 1.90 | 0.0003      | 0.0505 |
| 0  |   | regulation of transcription, DNA-templated                     | 1815             | 116      | 81.39    | 1.43 | 0.0002      | 0.0482 |
| 1  |   | regulation of cellular macromolecule biosynthetic process      | 1992             | 126      | 89.32    | 1.41 | 0.0002      | 0.0512 |
| 2  |   | regulation of cellular biosynthetic process                    | 2031             | 129      | 91.07    | 1.42 | 0.0001      | 0.0446 |
| 3  |   | regulation of biosynthetic process                             | 2054             | 129      | 92.10    | 1.40 | 0.0002      | 0.0492 |
| 2  |   | regulation of macromolecule biosynthetic process               | 2001             | 126      | 89.73    | 1.40 | 0.0002      | 0.0478 |
| 1  |   | regulation of gene expression                                  | 2190             | 146      | 98.2     | 1.49 | 0.0000      | 0.0043 |
| 1  |   | regulation of nucleic acid-templated transcription             | 1816             | 116      | 81.43    | 1.42 | 0.0002      | 0.0473 |
| 2  |   | regulation of RNA biosynthetic process                         | 1817             | 116      | 81.48    | 1.42 | 0.0002      | 0.0455 |
| 3  |   | regulation of RNA metabolic process                            | 1960             | 130      | 87.89    | 1.48 | 0.0000      | 0.0157 |
| 4  |   | regulation of nucleobase-containing compound metabolic process | 2044             | 135      | 91.66    | 1.47 | 0.0000      | 0.0152 |
| 0  |   | cellular protein modification process                          | 2229             | 141      | 99.95    | 1.41 | 0.0001      | 0.0359 |
| 1  |   | protein modification process                                   | 2229             | 141      | 99.95    | 1.41 | 0.0001      | 0.0383 |
| 2  |   | macromolecule modification                                     | 2357             | 146      | 105.69   | 1.38 | 0.0001      | 0.0447 |
| 0  |   | animal organ development                                       | 2248             | 139      | 100.8    | 1.38 | 0.0002      | 0.0514 |
| 1  |   | system development                                             | 3154             | 190      | 141.43   | 1.34 | 0.0000      | 0.0294 |
| 2  |   | multicellular organism development                             | 3591             | 209      | 161.03   | 1.30 | 0.0001      | 0.0487 |

| GO | H                                        | GO Complete                                                    | No. genes        |          |          |        | Raw p-value | FDR    |
|----|------------------------------------------|----------------------------------------------------------------|------------------|----------|----------|--------|-------------|--------|
|    |                                          |                                                                | zebrafish genome | No. obs. | No. exp. | FE     |             |        |
| CC | 0                                        | cyclin-dependent protein kinase holoenzyme complex             | 32               | 8        | 1.43     | 5.58   | 0.0003      | 0.0151 |
|    | 1                                        | serine/threonine protein kinase complex                        | 69               | 11       | 3.09     | 3.56   | 0.0006      | 0.0316 |
|    | 2                                        | protein kinase complex                                         | 82               | 13       | 3.68     | 3.54   | 0.0002      | 0.0135 |
|    | 3                                        | transferase complex, transferring phosphorus-containing groups | 216              | 25       | 9.69     | 2.58   | 0.0001      | 0.0053 |
|    | 4                                        | transferase complex                                            | 593              | 55       | 26.59    | 2.07   | 0.0000      | 0.0003 |
|    | 5                                        | catalytic complex                                              | 1035             | 77       | 46.41    | 1.66   | 0.0000      | 0.0032 |
|    | 6                                        | protein-containing complex                                     | 3792             | 229      | 170.04   | 1.35   | 0.0000      | 0.0006 |
|    | 1                                        | intracellular part                                             | 10545            | 561      | 472.85   | 1.19   | 0.0000      | 0.0001 |
|    | 2                                        | intracellular                                                  | 10545            | 561      | 472.85   | 1.19   | 0.0000      | 0.0001 |
|    | 3                                        | cell part                                                      | 13031            | 660      | 584.33   | 1.13   | 0.0000      | 0.0011 |
|    | 4                                        | cell                                                           | 13031            | 660      | 584.33   | 1.13   | 0.0000      | 0.0012 |
|    | 0                                        | SCF ubiquitin ligase complex                                   | 50               | 9        | 2.24     | 4.01   | 0.0009      | 0.0425 |
|    | 1                                        | cullin-RING ubiquitin ligase complex                           | 104              | 14       | 4.66     | 3.00   | 0.0005      | 0.0296 |
|    | 0                                        | nuclear body                                                   | 92               | 14       | 4.13     | 3.39   | 0.0002      | 0.0121 |
|    | 1                                        | nucleoplasm part                                               | 426              | 38       | 19.10    | 1.99   | 0.0002      | 0.0124 |
|    | 2                                        | nucleoplasm                                                    | 593              | 48       | 26.59    | 1.81   | 0.0002      | 0.0139 |
|    | 3                                        | nuclear lumen                                                  | 979              | 70       | 43.90    | 1.59   | 0.0003      | 0.0182 |
|    | 4                                        | organelle part                                                 | 4092             | 240      | 183.49   | 1.31   | 0.0000      | 0.0018 |
|    | 5                                        | organelle                                                      | 8339             | 455      | 373.93   | 1.22   | 0.0000      | 0.0002 |
|    | 4                                        | intracellular organelle                                        | 8155             | 450      | 365.68   | 1.23   | 0.0000      | 0.0001 |
| 3  | nuclear part                             | 1389                                                           | 98               | 62.29    | 1.57     | 0.0000 | 0.0020      |        |
| 4  | nucleus                                  | 4461                                                           | 260              | 200.04   | 1.30     | 0.0000 | 0.0010      |        |
| 5  | intracellular membrane-bounded organelle | 6785                                                           | 380              | 304.25   | 1.25     | 0.0000 | 0.0002      |        |
| 6  | membrane-bounded organelle               | 7138                                                           | 398              | 320.08   | 1.24     | 0.0000 | 0.0002      |        |
| 4  | intracellular organelle part             | 3926                                                           | 236              | 176.05   | 1.34     | 0.0000 | 0.0006      |        |
| 0  | bounding membrane of organelle           | 739                                                            | 54               | 33.14    | 1.63     | 0.0009 | 0.0433      |        |
| 1  | organelle membrane                       | 1095                                                           | 74               | 49.10    | 1.51     | 0.0009 | 0.0432      |        |
| MF | 0                                        | ubiquitin-protein transferase activity                         | 322              | 34       | 14.44    | 2.35   | 0.0000      | 0.0054 |
|    | 1                                        | ubiquitin-like protein transferase activity                    | 336              | 35       | 15.07    | 2.32   | 0.0000      | 0.0055 |

| GO | H | GO Complete                             | No. genes<br>zebrafish<br>genome | No. obs. | No. exp. | FE   | Raw p-<br>value | FDR    |
|----|---|-----------------------------------------|----------------------------------|----------|----------|------|-----------------|--------|
|    | 2 | catalytic activity, acting on a protein | 2605                             | 162      | 116.81   | 1.39 | 0.0000          | 0.0119 |
|    | 2 | transferase activity                    | 2769                             | 174      | 124.17   | 1.40 | 0.0000          | 0.0057 |
|    | 0 | protein binding                         | 3984                             | 244      | 178.65   | 1.37 | 0.0000          | 0.0005 |
|    | 1 | binding                                 | 11537                            | 620      | 517.34   | 1.20 | 0.0000          | 0.0000 |
|    | 0 | organic cyclic compound binding         | 6184                             | 345      | 277.30   | 1.24 | 0.0000          | 0.0057 |
|    | 0 | heterocyclic compound binding           | 6124                             | 341      | 274.61   | 1.24 | 0.0000          | 0.0053 |
