# Supplementary material for: Conservation of magnetite biomineralization genes in all domains of life and implications for magnetic sensing
Source: PubMed Central journal article supplement (PMC8784154; doi:10.1073/pnas.2108655119), 2022-01-10
Supplement: pnas.2108655119.sd02.pdf [file pnas.2108655119.sd02.pdf]

**Dataset S2.** List of magnetotactic bacteria (MTB) magnetosome-associated protein UniProt accessions (n=601) and names (n=108, including “Unknown”) used to evaluate distant homology with genes of eukaryote and Lokiarchaeota. A bidirectional BLASTp match between an individual MTB protein and a gene within genome contents of 13 eukaryotes, Lokiarchaeota, and five MTB, is indicated by x. The number (count) and percent of matches (% match) across the 13 eukaryote genomes are tallied as presence absence data. Columns labeled 1-13 are eukaryotes: (1) Panamanian leafcutter ant, *Acromyrmex echinator*, (2) honeybee, *Apis mellifera*, (3) roundworm, *Caenorhabditis elegans*, (4) fruit fly, *Drosophila melanogaster*, (5) California two-spot octopus, *Octopus bimaculoides*, (6) Little Brown Bat, *Myotis lucifugus*, (7) Chinook salmon, *Oncorhynchus tshawytscha*, (8) human, *Homo sapiens*, (9) naked mole-rat, *Heterocephalus glaber*, (10) mouse, *Mus musculus*, (11) Minke whale, *Balaenoptera acutorostrata scammoni*, (12) zebra finch, *Taeniopygia guttata*, and (13) zebrafish, *Danio rerio*. Column 14 is the asgard clade of Archaea Lokiarchaeota (A), and columns 15-19 are magnetotactic bacteria: (15) *Candidatus magnetobacterium casensis* (Nitrospirae), (16) *Candidatus Magnetomorum* sp. HK-1 (Deltaproteobacteria), and three Alphaproteobacteria (17) *Magnetococcus marinus* MC-1, (18) *Magnetospirillum magneticum* AMB-1, and (19) *Magnetospirillum magnetotacticum* MS1. Bidirectional BLASTp matches were filtered for  $E < 10e^{-3}$  in the eukaryote/Archaea to bacteria magnetosome-associated protein comparison.

| UniProt Accession | Protein name | Eukaryotes |   |   |   |   |   |   |   |   |    |    |    |    | A  | Magnetotactic bacteria |    |    |    |    | Count | % Match |   |      |
|-------------------|--------------|------------|---|---|---|---|---|---|---|---|----|----|----|----|----|------------------------|----|----|----|----|-------|---------|---|------|
|                   |              | 1          | 2 | 3 | 4 | 5 | 6 | 7 | 8 | 9 | 10 | 11 | 12 | 13 | 14 | 15                     | 16 | 17 | 18 | 19 |       |         |   |      |
| K7Y619_9DELTA     | Dam21        |            | x |   |   |   |   |   |   |   |    |    |    |    |    | x                      |    |    |    |    |       |         | 2 | 0.15 |
| K7YKX6_9DELTA     | Dam22        |            |   |   |   |   |   |   |   |   |    |    |    |    |    |                        |    |    |    |    |       |         | 0 | 0.00 |
| K7Y7J2_9DELTA     | Dam28        |            |   |   | x |   |   |   |   |   |    |    |    |    |    |                        |    |    |    |    |       |         | 1 | 0.08 |
| K7Y0C1_9DELTA     | FeoB         | x          |   |   | x |   |   | x |   |   |    |    | x  | x  |    |                        |    |    |    |    |       | x       | 5 | 0.38 |
| A0A0M9ECT4_9DELTA | Mad1         |            | x |   |   |   |   |   |   |   |    |    |    |    |    |                        |    |    |    |    |       | x       | 1 | 0.08 |
| M1RA87_9BACT      | Mad1         |            |   |   |   |   |   |   | x | x |    |    |    |    |    |                        |    |    |    |    |       |         | 2 | 0.15 |
| U5IGI8_9DELTA     | Mad1         |            |   |   |   |   |   |   |   |   |    |    |    |    |    |                        |    |    |    |    |       |         | 0 | 0.00 |
| A0A088FCJ2_9BACT  | Mad10        |            |   |   |   |   |   |   |   |   |    |    |    |    |    |                        |    |    |    |    |       |         | 0 | 0.00 |
| A0A0N0V130_9DELTA | Mad10        |            |   |   | x |   |   |   |   |   |    |    |    |    |    |                        |    |    |    |    |       | x       | 1 | 0.08 |
| A0A125P3F7_9BACT  | Mad10        |            |   |   |   | x |   | x |   |   |    |    |    |    |    |                        |    |    |    |    |       |         | 2 | 0.15 |
| A0A142BTU7_9BACT  | Mad10        |            |   |   |   |   |   |   |   |   |    |    |    |    |    |                        |    |    |    |    |       |         | 0 | 0.00 |
| A0A142BTW5_9BACT  | Mad10        |            |   |   |   |   |   |   |   |   |    |    |    |    |    |                        |    |    |    |    |       |         | 0 | 0.00 |
| A0A142BU09_9BACT  | Mad10        |            |   |   |   |   |   |   | x |   |    |    |    | x  |    |                        |    |    |    |    |       | x       | 2 | 0.15 |
| A0A142BU45_9BACT  | Mad10        |            |   |   |   |   |   |   | x | x |    |    |    |    |    |                        |    |    |    |    |       |         | 2 | 0.15 |
| M1QLM3_9BACT      | Mad10        |            |   |   |   |   |   |   |   |   |    |    |    |    |    |                        |    |    |    |    |       | x       | 0 | 0.00 |
| U5IHW3_9DELTA     | Mad10        |            |   |   |   |   |   |   |   |   |    |    |    |    |    |                        |    |    |    |    |       |         | 0 | 0.00 |
| A0A0F2J479_9BACT  | Mad11        |            |   |   |   |   |   |   |   |   |    |    |    |    |    |                        |    |    |    |    |       |         | 0 | 0.00 |
| A0A0F3GMB8_9BACT  | Mad11        |            |   |   |   |   |   |   |   |   |    |    |    |    |    |                        |    |    |    |    |       |         | 0 | 0.00 |
| A0A0H3Y7F5_9BACT  | Mad11        |            |   |   |   |   |   |   | x |   |    |    |    |    |    |                        |    |    |    |    |       |         | 1 | 0.08 |

| UniProt Accession | Protein name | <u>Eukaryotes</u> |   |   |   |   |   |   |   |   |    |    |    |    | <u>A</u> | <u>Magnetotactic bacteria</u> |    |    |    |    | Count | % Match |      |      |
|-------------------|--------------|-------------------|---|---|---|---|---|---|---|---|----|----|----|----|----------|-------------------------------|----|----|----|----|-------|---------|------|------|
|                   |              | 1                 | 2 | 3 | 4 | 5 | 6 | 7 | 8 | 9 | 10 | 11 | 12 | 13 | 14       | 15                            | 16 | 17 | 18 | 19 |       |         |      |      |
| A0A0N0D3V2_9DEL   | Mad11        |                   |   |   |   |   |   |   |   |   |    |    |    |    |          |                               | x  |    |    |    |       | 0       | 0.00 |      |
| U5IGJ8_9DEL       | Mad11        |                   |   |   |   |   |   |   |   |   |    |    |    |    |          |                               |    |    |    |    |       |         | 0    | 0.00 |
| A0A0N0D2W6_9DEL   | Mad12        |                   |   |   |   |   |   |   |   |   |    |    |    |    |          |                               | x  |    |    |    |       |         | 0    | 0.00 |
| A0A0N0D263_9DEL   | Mad17        |                   |   |   |   |   |   |   |   |   |    |    |    |    |          |                               | x  |    |    |    |       |         | 0    | 0.00 |
| A0A109CXN6_9BACT  | Mad17        |                   | x | x | x | x | x | x | x | x | x  | x  | x  | x  |          | x                             |    | x  | x  | x  |       | 12      | 0.92 |      |
| M1RG59_9DEL       | Mad17        | x                 | x | x |   | x | x |   |   |   |    |    |    | x  |          |                               |    |    |    |    |       |         | 5    | 0.38 |
| M1RMK5_9BACT      | Mad17        |                   |   |   |   |   |   | x |   | x |    | x  | x  |    |          |                               |    |    |    |    |       |         | 4    | 0.31 |
| A0A088F9L7_9BACT  | Mad2         |                   |   |   |   |   |   |   |   |   |    |    |    |    |          |                               | x  |    |    |    |       |         | 0    | 0.00 |
| A0A0F2J6P0_9BACT  | Mad2         |                   |   |   |   |   |   |   |   |   |    |    |    |    |          |                               |    |    |    |    |       |         | 0    | 0.00 |
| A0A0F3GSK4_9BACT  | Mad2         |                   |   |   |   |   |   |   |   |   |    |    |    |    |          |                               |    |    |    |    |       |         | 0    | 0.00 |
| A0A109CXB8_9BACT  | Mad2         |                   |   |   |   |   |   |   |   |   |    |    |    |    |          |                               |    |    |    |    |       |         | 0    | 0.00 |
| A0A142BTX2_9BACT  | Mad2         |                   |   |   |   |   |   |   |   |   |    |    |    |    |          |                               |    |    |    |    |       |         | 0    | 0.00 |
| A0A142BU16_9BACT  | Mad2         |                   |   |   |   |   |   |   |   |   |    |    |    |    |          |                               |    |    |    |    |       |         | 0    | 0.00 |
| A0A142BU52_9BACT  | Mad2         |                   |   |   |   |   |   |   | x |   |    |    |    |    |          |                               |    |    |    |    |       |         | 1    | 0.08 |
| M1RMJ1_9BACT      | Mad2         |                   |   |   |   |   |   |   |   |   |    |    |    |    |          |                               |    | x  |    |    |       |         | 0    | 0.00 |
| A0A0F3GSJ9_9BACT  | Mad20        |                   |   |   |   |   |   |   |   |   |    |    |    | x  |          |                               |    |    |    |    |       |         | 1    | 0.08 |
| M1RMK8_9BACT      | Mad20        |                   |   |   |   |   |   |   |   |   |    |    |    |    |          |                               |    |    |    |    |       |         | 0    | 0.00 |
| U5IHY0_9DEL       | Mad20        |                   |   |   |   |   | x |   |   | x |    | x  |    |    |          |                               |    |    |    |    |       |         | 3    | 0.23 |
| M1RVI3_9BACT      | Mad21        |                   |   |   |   |   |   |   |   |   |    |    |    |    |          |                               |    |    |    |    |       |         | 0    | 0.00 |
| U5IGN4_9DEL       | Mad21        |                   |   |   |   |   |   |   |   | x |    |    |    |    | x        |                               |    |    |    |    |       |         | 2    | 0.15 |
| A0A0M9E5G1_9DEL   | Mad21-1      |                   | x |   |   |   | x |   | x | x | x  | x  |    |    |          |                               |    | x  |    |    |       |         | 6    | 0.46 |
| A0A0N1J199_9DEL   | Mad22        | x                 |   |   |   |   | x | x |   | x |    |    |    |    |          |                               | x  | x  |    |    |       |         | 4    | 0.31 |
| M1RG91_9BACT      | Mad22        |                   |   |   |   |   |   |   |   |   |    |    | x  | x  |          |                               |    |    |    |    |       |         | 2    | 0.15 |
| U5IGK2_9DEL       | Mad22        |                   |   |   | x |   |   |   |   |   |    |    |    |    |          |                               |    |    |    |    |       |         | 1    | 0.08 |
| A0A0F2J1L8_9BACT  | Mad23        |                   |   |   |   |   |   |   |   |   |    |    |    |    |          |                               |    |    |    |    |       |         | 0    | 0.00 |
| A0A0F3GSJ4_9BACT  | Mad23        |                   |   |   |   |   |   | x |   |   |    |    |    | x  |          |                               |    |    |    |    |       |         | 2    | 0.15 |
| A0A120DCN2_9BACT  | Mad23        |                   |   |   |   |   |   |   |   |   |    |    |    |    |          |                               |    |    |    |    |       |         | 0    | 0.00 |
| A0A142BTY1_9BACT  | Mad23        |                   |   | x | x |   |   |   | x | x | x  |    |    |    |          |                               |    |    |    |    |       |         | 5    | 0.38 |
| A0A142BU25_9BACT  | Mad23        |                   |   |   | x |   |   |   |   |   |    |    |    |    | x        | x                             |    |    |    | x  |       |         | 1    | 0.08 |
| M1RA76_9BACT      | Mad23        |                   | x |   |   |   |   | x |   |   |    |    |    |    |          |                               |    |    |    |    |       |         | 2    | 0.15 |
| U5IHW5_9DEL       | Mad23        | x                 |   | x | x | x |   |   |   | x | x  | x  |    | x  |          |                               |    |    |    |    |       |         | 8    | 0.62 |
| A0A0M9E510_9DEL   | Mad23-1      | x                 | x | x | x | x | x | x |   |   | x  |    |    | x  |          |                               |    |    |    |    | x     |         | 9    | 0.69 |
| A0A0M9E2C3_9DEL   | Mad23-2      |                   |   |   |   |   |   |   |   |   |    |    |    |    |          |                               |    |    |    |    |       | x       | 0    | 0.00 |
| A0A088F9L1_9BACT  | Mad23-I      |                   | x |   |   |   |   |   |   |   |    |    |    |    |          |                               |    |    |    |    |       |         | 1    | 0.08 |
| A0A088F8I8_9BACT  | Mad23-II     |                   |   |   |   |   |   | x |   |   | x  |    |    |    |          |                               | x  |    |    |    |       |         | 2    | 0.15 |

| UniProt Accession | Protein name | <u>Eukaryotes</u> |   |   |   |   |   |   |   |   |    |    |    |    |    | <u>Magnetotactic bacteria</u> |    |    |    |    | Count | % Match |
|-------------------|--------------|-------------------|---|---|---|---|---|---|---|---|----|----|----|----|----|-------------------------------|----|----|----|----|-------|---------|
|                   |              | 1                 | 2 | 3 | 4 | 5 | 6 | 7 | 8 | 9 | 10 | 11 | 12 | 13 | 14 | 15                            | 16 | 17 | 18 | 19 |       |         |
| A0A088FCD9_9BACT  | Mad24        |                   |   |   |   |   | x |   |   |   | x  |    |    |    |    | x                             |    |    |    |    | 2     | 0.15    |
| A0A0F2J410_9BACT  | Mad24        |                   |   |   |   |   |   |   |   |   |    |    |    |    |    |                               | x  |    |    |    | 0     | 0.00    |
| A0A0F3GS82_9BACT  | Mad24        |                   |   |   |   |   |   |   |   |   |    |    |    |    |    |                               |    |    |    |    | 0     | 0.00    |
| A0A120DCN3_9BACT  | Mad24        |                   |   | x |   |   |   |   |   | x |    |    |    |    |    |                               |    |    | x  |    | 2     | 0.15    |
| A0A142BTY2_9BACT  | Mad24        |                   |   |   |   |   |   |   |   |   |    |    |    |    |    |                               |    |    |    |    | 0     | 0.00    |
| A0A142BU26_9BACT  | Mad24        |                   |   |   |   |   |   |   |   |   |    |    |    |    |    |                               |    |    |    |    | 0     | 0.00    |
| M1QLM7_9BACT      | Mad24        | x                 |   |   |   | x |   | x |   |   |    | x  |    |    |    |                               |    |    |    |    | 4     | 0.31    |
| M1RMI3_9BACT      | Mad24        |                   |   |   |   |   |   |   |   |   |    |    |    |    |    |                               |    |    |    |    | 0     | 0.00    |
| A0A0M9E319_9DELTA | Mad24-2      |                   |   |   |   |   |   |   |   | x |    |    | x  |    |    |                               |    |    | x  |    | 2     | 0.15    |
| A0A0N0D2V7_9DELTA | Mad24-2      |                   |   |   |   |   | x |   | x |   |    | x  |    |    | x  |                               |    |    | x  |    | 4     | 0.31    |
| A0A088F8P3_9BACT  | Mad25        |                   |   |   |   |   |   |   |   |   |    |    |    | x  |    | x                             |    |    |    |    | 1     | 0.08    |
| A0A0F2IYL9_9BACT  | Mad25        | x                 |   |   | x |   |   |   | x |   |    |    |    |    |    |                               |    |    |    |    | 3     | 0.23    |
| A0A0F3GSE1_9BACT  | Mad25        |                   |   |   |   |   | x |   |   |   |    |    |    |    |    |                               | x  |    |    |    | 1     | 0.08    |
| A0A109CXJ6_9BACT  | Mad25        |                   |   |   | x | x | x | x | x | x | x  | x  | x  | x  |    |                               |    |    |    |    | 9     | 0.69    |
| A0A142BTY3_9BACT  | Mad25        |                   |   |   |   | x |   |   |   |   | x  |    |    |    |    |                               |    |    |    |    | 2     | 0.15    |
| A0A142BU27_9BACT  | Mad25        |                   |   |   |   |   |   |   |   |   |    |    |    |    |    |                               |    |    |    |    | 0     | 0.00    |
| M1RML3_9BACT      | Mad25        | x                 | x | x |   |   | x |   | x |   |    | x  |    |    |    |                               |    |    |    |    | 6     | 0.46    |
| M1RVF5_9BACT      | Mad25        |                   |   |   |   | x |   |   |   |   |    |    |    | x  |    |                               |    |    |    |    | 1     | 0.08    |
| A0A088FCH5_9BACT  | Mad26        |                   |   |   |   | x | x |   |   |   |    |    |    | x  |    | x                             |    |    |    |    | 3     | 0.23    |
| A0A0F2IZM6_9BACT  | Mad26        |                   |   |   |   |   |   |   |   |   |    |    |    |    |    |                               |    |    |    |    | 0     | 0.00    |
| A0A0F3GW06_9BACT  | Mad26        |                   |   |   |   |   |   |   |   |   |    |    | x  |    |    |                               |    |    |    |    | 1     | 0.08    |
| A0A109CUC4_9BACT  | Mad26        |                   | x |   |   |   |   |   |   |   |    |    |    |    |    |                               |    |    |    |    | 1     | 0.08    |
| A0A142BTY4_9BACT  | Mad26        |                   |   |   |   | x |   |   |   | x | x  |    | x  |    |    |                               |    |    |    |    | 4     | 0.31    |
| A0A142BU28_9BACT  | Mad26        |                   |   |   |   |   |   |   |   |   |    |    |    |    |    |                               |    |    |    |    | 0     | 0.00    |
| M1RVI8_9BACT      | Mad26        |                   |   |   |   |   |   | x |   |   |    |    |    |    |    |                               |    |    |    |    | 1     | 0.08    |
| A0A0M9E4Z0_9DELTA | Mad26-1      |                   |   |   |   |   | x |   |   |   |    |    |    |    |    |                               |    |    | x  |    | 1     | 0.08    |
| A0A0M9E2N1_9DELTA | Mad26-2      |                   |   |   | x |   |   | x |   |   |    | x  |    |    |    |                               |    |    | x  |    | 3     | 0.23    |
| M1RVJ3_9BACT      | Mad27        | x                 |   |   | x | x |   |   |   |   |    |    |    | x  | x  | x                             |    |    |    |    | 4     | 0.31    |
| A0A0M9E606_9DELTA | Mad27-1      |                   |   | x | x | x | x | x | x | x | x  | x  | x  | x  |    |                               | x  | x  |    |    | 11    | 0.85    |
| A0A0M9E220_9DELTA | Mad27-2      |                   | x | x | x | x | x |   | x | x | x  | x  | x  | x  |    | x                             | x  |    | x  | x  | 11    | 0.85    |
| A0A088FCJ5_9BACT  | Mad28        |                   |   |   |   |   |   |   | x |   | x  |    |    |    |    | x                             |    |    |    |    | 2     | 0.15    |
| A0A109CY44_9BACT  | Mad28        |                   |   |   |   |   |   |   |   |   |    |    |    |    |    |                               |    |    |    |    | 0     | 0.00    |
| A0A142BTT3_9BACT  | Mad28        |                   |   |   |   |   |   |   |   |   | x  |    |    |    |    |                               |    |    |    |    | 1     | 0.08    |
| A0A142BTV9_9BACT  | Mad28        |                   |   |   |   |   |   |   |   |   |    |    |    |    |    |                               |    |    |    |    | 0     | 0.00    |
| A0A142BU04_9BACT  | Mad28        |                   |   |   |   |   |   |   |   |   |    |    |    |    |    |                               |    |    |    |    | 0     | 0.00    |

| UniProt Accession | Protein name | Eukaryotes |   |   |   |   |   |   |   |   |    |    | Magnetotactic bacteria |    |    |    | Count | % Match |    |    |    |      |
|-------------------|--------------|------------|---|---|---|---|---|---|---|---|----|----|------------------------|----|----|----|-------|---------|----|----|----|------|
|                   |              | 1          | 2 | 3 | 4 | 5 | 6 | 7 | 8 | 9 | 10 | 11 | 12                     | 13 | 14 | 15 |       |         | 16 | 17 | 18 | 19   |
| A0A142BU40_9BACT  | Mad28        |            |   |   | x |   | x | x |   |   |    |    |                        |    |    |    |       |         |    |    | 3  | 0.23 |
| M1RA80_9BACT      | Mad28        | x          |   |   |   |   |   |   |   |   |    |    |                        |    |    |    |       |         |    |    | 1  | 0.08 |
| A0A0F2J3Z6_9BACT  | Mad28-1      |            |   |   |   |   |   | x |   |   |    |    |                        |    |    |    |       |         |    |    | 1  | 0.08 |
| A0A0F3GQM5_9BACT  | Mad28-1      |            |   | x |   |   |   |   | x |   | x  | x  |                        |    |    |    |       |         |    |    | 4  | 0.31 |
| A0A0N0D423_9DELTA | Mad28-1      |            |   |   |   |   |   |   |   |   |    |    |                        |    |    |    | x     |         |    |    | 0  | 0.00 |
| A0A0F2J7B2_9BACT  | Mad28-2      |            | x |   |   |   |   |   |   |   |    |    |                        |    |    |    |       |         |    |    | 1  | 0.08 |
| A0A0F3GM90_9BACT  | Mad28-2      |            |   |   |   |   |   |   |   |   |    |    |                        |    |    | x  |       |         |    |    | 0  | 0.00 |
| A0A0M9E946_9DELTA | Mad28-2      |            | x |   | x | x |   | x |   |   | x  | x  | x                      | x  |    |    | x     |         |    |    | 8  | 0.62 |
| A0A109CXB0_9BACT  | Mad28-2      |            |   |   |   |   |   |   |   |   |    |    |                        |    |    |    |       |         |    |    | 0  | 0.00 |
| A0A0F3GWQ5_9BACT  | Mad28-3      |            |   |   |   |   |   |   |   |   |    |    |                        |    |    |    |       |         |    |    | 0  | 0.00 |
| A0A0F3GXB1_9BACT  | Mad28-5      |            |   |   |   |   |   |   | x |   |    |    |                        |    |    |    |       |         |    |    | 1  | 0.08 |
| A0A0F3GRG4_9BACT  | Mad28-6      |            |   |   |   |   |   |   | x | x |    |    |                        |    |    |    |       |         |    |    | 2  | 0.15 |
| A0A0F2J572_9BACT  | Mad29        | x          |   |   |   |   |   |   |   |   | x  |    |                        | x  |    |    |       |         |    |    | 2  | 0.15 |
| A0A125P317_9BACT  | Mad29        |            |   |   |   |   |   |   |   |   |    |    |                        | x  |    |    |       |         |    |    | 1  | 0.08 |
| A0A142BTT5_9BACT  | Mad29        | x          | x | x | x | x | x | x | x | x |    |    | x                      | x  |    |    | x     | x       | x  | x  | 12 | 0.92 |
| A0A142BTW1_9BACT  | Mad29        |            |   |   |   |   |   |   |   |   |    |    |                        |    |    |    |       |         |    |    | 0  | 0.00 |
| M1RML8_9BACT      | Mad29        |            |   |   |   |   |   |   |   |   |    |    |                        |    |    |    |       |         |    |    | 0  | 0.00 |
| A0A0F3GWM7_9BACT  | Mad29-1      |            |   |   |   |   | x |   | x |   |    | x  |                        |    |    |    |       |         |    |    | 3  | 0.23 |
| A0A0F3GL85_9BACT  | Mad29-2      |            |   |   |   |   |   |   |   |   |    |    |                        | x  | x  |    |       |         |    |    | 0  | 0.00 |
| A0A0F2J6W1_9BACT  | Mad30        |            |   |   |   |   |   | x |   |   |    |    |                        |    |    |    |       |         |    |    | 1  | 0.08 |
| A0A0F3GN75_9BACT  | Mad30        |            |   |   |   |   |   |   |   |   |    |    |                        |    |    | x  |       |         |    |    | 0  | 0.00 |
| A0A0M9DZT2_9DELTA | Mad30        |            |   |   |   |   |   |   |   |   |    |    |                        |    |    |    | x     |         | x  | x  | 0  | 0.00 |
| A0A109CXN1_9BACT  | Mad30        |            |   |   |   |   |   |   |   |   |    |    |                        |    |    |    |       |         |    |    | 0  | 0.00 |
| M1RA46_9DELTA     | Mad30        |            |   |   |   |   |   |   |   |   |    |    |                        |    |    |    |       |         |    |    | 0  | 0.00 |
| M1RG63_9BACT      | Mad30        |            |   |   |   |   |   |   | x |   |    |    |                        |    |    |    |       |         | x  | x  | 1  | 0.08 |
| M1RVH8_9BACT      | Mad30        |            |   |   |   |   |   |   |   |   |    |    |                        | x  |    |    |       |         |    |    | 0  | 0.00 |
| A0A0F2J3L5_9BACT  | Mad31        |            |   |   |   |   |   |   |   |   |    |    |                        |    |    |    |       |         |    |    | 0  | 0.00 |
| A0A0F3GSF2_9BACT  | Mad31        |            |   |   |   |   |   |   |   |   |    |    |                        |    |    |    |       |         |    |    | 0  | 0.00 |
| A0A109CX41_9BACT  | Mad31        |            |   |   |   |   |   |   |   |   |    |    |                        |    |    |    |       |         |    |    | 0  | 0.00 |
| A0A142BTV1_9BACT  | Mad31        |            |   |   |   |   |   |   |   |   |    |    |                        |    |    |    | x     |         |    |    | 0  | 0.00 |
| A0A142BTW9_9BACT  | Mad31        |            |   |   |   |   |   |   |   |   |    |    |                        |    |    |    |       |         |    |    | 0  | 0.00 |
| A0A142BU13_9BACT  | Mad31        |            |   |   |   |   |   |   |   |   |    |    |                        |    |    |    | x     |         |    |    | 0  | 0.00 |
| A0A142BU49_9BACT  | Mad31        |            |   |   |   |   |   |   |   |   |    |    |                        |    |    |    |       |         |    |    | 0  | 0.00 |
| A0A0N0V2S1_9DELTA | Mad4         |            |   |   |   | x |   |   |   |   |    |    |                        |    |    |    |       |         |    | x  | 1  | 0.08 |
| M1RVG8_9BACT      | Mad4         |            |   |   |   |   |   |   |   |   |    |    |                        |    |    |    |       |         |    |    | 0  | 0.00 |











| UniProt Accession | Protein name | Eukaryotes |   |   |   |   |   |   |   |   |    |    |    |    |    | Magnetotactic bacteria |    |    |    |    | Count | % Match |
|-------------------|--------------|------------|---|---|---|---|---|---|---|---|----|----|----|----|----|------------------------|----|----|----|----|-------|---------|
|                   |              | 1          | 2 | 3 | 4 | 5 | 6 | 7 | 8 | 9 | 10 | 11 | 12 | 13 | 14 | 15                     | 16 | 17 | 18 | 19 |       |         |
| M1RA60_9BACT      | MamE         |            |   |   |   | x |   | x | x | x |    |    |    |    |    |                        |    |    |    |    | 4     | 0.31    |
| M1RMJ6_9BACT      | MamE         |            |   |   |   |   |   |   |   |   |    |    |    |    |    |                        |    |    |    |    | 0     | 0.00    |
| Q6NE61_9PROT      | MamE         |            |   |   |   |   |   |   |   |   |    |    |    |    |    |                        |    |    |    |    | 0     | 0.00    |
| V6F2B6_9PROT      | MamE         |            |   |   |   |   |   |   |   |   |    |    |    |    |    |                        |    |    |    |    | 0     | 0.00    |
| W6K5N2_9PROT      | MamE         |            |   |   |   |   |   |   |   |   |    |    |    |    |    |                        |    |    |    |    | 0     | 0.00    |
| A0A0M9E3G8_9DELTA | MamE-Cter    |            | x | x |   | x |   |   |   |   |    |    |    |    |    |                        | x  | x  |    |    | 3     | 0.23    |
| A0A0M9ED85_9DELTA | MamE-Cter    | x          |   | x | x |   | x |   | x | x | x  |    | x  | x  |    |                        | x  |    |    |    | 9     | 0.69    |
| U5IIP0_9DELTA     | MamE-Cter    | x          |   |   |   |   |   |   |   |   |    |    |    |    |    |                        |    |    |    |    | 1     | 0.08    |
| A0A0M9E426_9DELTA | MamE-Nter    |            |   |   |   |   |   |   |   |   |    |    |    |    |    |                        | x  |    |    |    | 0     | 0.00    |
| A0A0M9EDB3_9DELTA | MamE-Nter    |            |   |   |   |   |   |   |   |   |    |    |    |    |    |                        | x  |    |    |    | 0     | 0.00    |
| A0A0N0D6D8_9DELTA | MamE-Nter    |            |   |   |   |   |   |   |   |   |    |    |    |    |    |                        | x  |    |    |    | 0     | 0.00    |
| A0A023UKD7_9GAMMA | MamE'        |            |   | x |   |   |   |   |   |   |    |    |    |    |    |                        |    |    |    |    | 1     | 0.08    |
| G81QT9_9DELTA     | MamE*        |            |   |   |   |   |   |   |   |   |    |    |    |    |    |                        |    |    |    |    | 0     | 0.00    |
| M1QLL0_9BACT      | MamEO        | x          |   |   | x |   |   |   |   |   |    |    |    |    |    |                        |    |    |    |    | 2     | 0.15    |
| U5IGM4_9DELTA     | MamEO-Cter   |            |   | x |   |   |   |   |   |   |    |    |    |    |    |                        |    |    |    |    | 1     | 0.08    |
| U5IHV7_9DELTA     | MamEO-Nter   |            |   |   |   |   |   | x |   |   |    |    |    | x  |    |                        | x  |    |    |    | 2     | 0.15    |
| A0A0C2U5F8_MAGMA  | MamF         |            |   |   |   |   |   |   |   |   |    |    |    |    |    |                        |    |    | x  | x  | 0     | 0.00    |
| A0A0U5I0K8_9PROT  | MamF         |            |   |   |   |   |   |   |   |   |    |    |    |    |    |                        |    |    |    |    | 0     | 0.00    |
| A0A0U5MFD3_9PROT  | MamF         |            |   |   |   |   |   |   |   |   |    |    |    |    |    |                        |    |    | x  |    | 0     | 0.00    |
| A0A0U5MHZ9_9PROT  | MamF         |            |   |   |   |   |   |   |   |   |    |    | x  |    |    |                        |    |    | x  | x  | 1     | 0.08    |
| A0A1C3RFM2_9RHIZ  | MamF         |            |   |   |   |   |   |   |   |   |    |    |    |    |    |                        |    |    |    |    | 0     | 0.00    |
| A0A1C3RKE7_9RHIZ  | MamF         |            |   |   |   |   |   |   |   |   |    |    |    |    |    |                        |    |    |    |    | 0     | 0.00    |
| A0A1S7LFC6_9BACT  | MamF         |            |   |   |   |   |   |   |   |   |    |    |    |    |    |                        | x  | x  |    |    | 0     | 0.00    |
| A0A1S7LFJ0_9BACT  | MamF         |            |   |   |   |   |   |   |   |   |    |    |    |    |    |                        |    | x  |    |    | 0     | 0.00    |
| C5JAI9_9BACT      | MamF         |            |   |   |   |   |   |   |   |   |    |    |    |    |    |                        |    |    |    |    | 0     | 0.00    |
| C5JBM6_9BACT      | MamF         |            |   |   |   |   |   |   |   |   |    |    |    |    |    |                        |    |    |    |    | 0     | 0.00    |
| Q6NE74_9PROT      | MamF         |            |   |   |   |   |   |   |   |   |    |    |    |    |    |                        |    |    |    |    | 0     | 0.00    |
| V6F254_9PROT      | MamF         |            |   |   |   |   |   |   |   |   |    |    |    |    |    |                        |    |    |    |    | 0     | 0.00    |
| W0LN58_9PROT      | MamF         |            |   |   |   |   |   |   |   |   |    |    |    |    |    |                        |    |    |    |    | 0     | 0.00    |
| C5JBM7_9BACT      | MamG-like    |            |   |   |   |   |   |   |   |   |    |    |    |    |    |                        |    |    |    |    | 0     | 0.00    |
| A0A0U5N344_9PROT  | MamH         | x          | x |   |   |   |   | x |   |   |    |    |    |    |    |                        |    |    | x  | x  | 3     | 0.23    |
| A0A1C3RFR4_9RHIZ  | MamH         |            | x | x | x | x | x | x | x | x | x  | x  |    |    |    |                        |    |    |    |    | 11    | 0.85    |
| A0A1S7LFY5_9BACT  | MamH         |            |   |   |   |   |   | x | x | x |    | x  |    |    |    |                        |    | x  |    |    | 4     | 0.31    |
| C4RAF1_9PROT      | MamH         | x          |   |   | x |   | x | x | x | x | x  |    |    |    | x  |                        |    |    |    |    | 8     | 0.62    |
| C5JAJ0_9BACT      | MamH         |            |   |   |   | x |   | x | x |   |    |    |    | x  | x  | x                      |    |    |    |    | 4     | 0.31    |

















| UniProt Accession | Protein name | <u>Eukaryotes</u> |   |   |   |   |   |   |   |   |    |    | <u>Magnetotactic bacteria</u> |    |    |    |    |    | Count | % Match |    |      |
|-------------------|--------------|-------------------|---|---|---|---|---|---|---|---|----|----|-------------------------------|----|----|----|----|----|-------|---------|----|------|
|                   |              | 1                 | 2 | 3 | 4 | 5 | 6 | 7 | 8 | 9 | 10 | 11 | 12                            | 13 | 14 | 15 | 16 | 17 |       |         | 18 | 19   |
| A0A1C3RH47_9RHIZ  | mamX         |                   | x |   |   |   |   |   |   |   |    |    |                               |    |    |    |    |    |       |         | 1  | 0.08 |
| A0A1S7LF68_9BACT  | MamX         |                   |   |   |   |   | x |   |   |   |    |    |                               |    |    |    |    | x  |       |         | 1  | 0.08 |
| A4U5C4_9PROT      | MamX         | x                 |   |   |   |   |   |   |   |   |    |    |                               |    |    |    |    |    |       |         | 1  | 0.08 |
| V6F2C2_9PROT      | MamX         |                   |   |   |   |   |   |   |   |   |    |    |                               |    |    |    |    |    |       |         | 0  | 0.00 |
| W0LJD8_9PROT      | MamX         |                   |   |   |   |   |   |   |   |   |    |    |                               |    |    |    |    |    |       |         | 0  | 0.00 |
| W6K5M8_9PROT      | MamX         |                   |   |   |   |   |   |   |   |   |    |    |                               |    |    |    |    |    |       |         | 0  | 0.00 |
| A0A0C2UFM5_MAGMG  | MamY         |                   |   |   |   |   |   |   |   |   |    |    |                               |    |    |    |    |    | x     | x       | 0  | 0.00 |
| A0A0U5MHN7_9PROT  | MamY         |                   |   |   | x |   |   |   |   |   |    |    |                               |    |    |    |    |    |       |         | 1  | 0.08 |
| C4RAF9_9PROT      | MamY         |                   |   |   |   |   |   |   |   |   |    |    |                               |    |    |    |    |    |       |         | 0  | 0.00 |
| Q3BK69_9PROT      | MamY         |                   |   |   |   |   |   |   |   |   |    |    |                               |    |    |    |    |    |       |         | 0  | 0.00 |
| W6KHI2_9PROT      | MamY         |                   |   |   |   | x |   |   |   |   |    |    | x                             |    |    |    |    |    |       |         | 2  | 0.15 |
| A0A088F8L0_9BACT  | Man1         |                   |   |   |   |   |   |   |   |   |    |    |                               |    |    |    |    |    |       |         | 0  | 0.00 |
| A0A125P3G0_9BACT  | Man1         |                   |   |   |   |   |   |   |   |   | x  |    |                               |    |    |    |    |    |       |         | 1  | 0.08 |
| A0A142BTU4_9BACT  | Man1         |                   |   |   |   |   |   |   |   |   |    |    |                               |    |    |    |    |    |       |         | 0  | 0.00 |
| A0A142BU05_9BACT  | Man1         |                   |   |   |   |   |   |   |   |   |    |    |                               | x  |    |    |    |    |       |         | 1  | 0.08 |
| A0A142BU41_9BACT  | Man1         |                   |   |   |   |   |   |   |   |   | x  |    |                               |    |    |    |    |    |       |         | 1  | 0.08 |
| A0A088F9L3_9BACT  | Man4         |                   |   |   |   |   | x |   | x | x | x  | x  |                               | x  |    |    |    |    |       | x       | 6  | 0.46 |
| A0A120DCN1_9BACT  | Man4         |                   |   |   |   |   |   |   |   |   | x  |    |                               |    |    |    |    |    |       |         | 1  | 0.08 |
| A0A142BTV8_9BACT  | Man4         |                   |   |   |   |   |   |   |   |   |    | x  |                               |    |    |    |    |    |       |         | 1  | 0.08 |
| A0A142BTX7_9BACT  | Man4         |                   |   |   | x |   |   |   |   | x | x  |    |                               | x  |    |    |    |    |       |         | 4  | 0.31 |
| A0A142BU21_9BACT  | Man4         |                   |   |   |   |   |   |   |   |   |    |    |                               |    |    |    |    |    |       |         | 0  | 0.00 |
| A0A088FCE2_9BACT  | Man5         |                   |   |   | x |   | x |   |   |   |    |    |                               | x  | x  |    |    |    |       | x       | 4  | 0.31 |
| A0A0F3GS87_9BACT  | Man5         |                   |   |   |   |   |   |   |   |   |    |    |                               |    |    |    |    |    |       |         | 0  | 0.00 |
| A0A109CWW5_9BACT  | Man5         |                   |   |   |   |   |   |   |   |   |    |    |                               |    |    |    |    |    |       |         | 0  | 0.00 |
| A0A142BTX8_9BACT  | Man5         |                   |   |   | x |   |   |   |   | x | x  |    |                               |    |    |    |    |    |       |         | 3  | 0.23 |
| A0A142BU22_9BACT  | Man5         |                   |   |   |   |   |   |   |   |   |    |    |                               |    |    |    |    |    |       |         | 0  | 0.00 |
| A0A0F3GSE5_9BACT  | Man5-Cter    |                   |   |   |   |   |   |   |   |   |    |    |                               |    |    |    |    |    |       |         | 2  | 0.15 |
| A0A088F8P8_9BACT  | Man6         |                   | x | x |   |   | x | x | x | x | x  | x  | x                             |    |    |    |    |    |       | x       | 10 | 0.77 |
| A0A0F3GW11_9BACT  | Man6         | x                 | x | x |   | x |   | x | x |   |    |    |                               | x  |    |    |    |    |       |         | 7  | 0.54 |
| A0A120DCM7_9BACT  | Man6         |                   | x | x |   |   | x | x | x | x | x  | x  |                               |    |    |    |    |    |       |         | 9  | 0.69 |
| A0A142BTX9_9BACT  | Man6         |                   | x |   |   |   |   |   |   |   |    |    |                               |    |    |    |    |    |       |         | 1  | 0.08 |
| A0A142BU23_9BACT  | Man6         |                   |   |   |   |   |   |   |   |   |    |    |                               |    |    |    |    |    |       |         | 0  | 0.00 |
| A0A212KIW2_9PROT  | MmeA         |                   |   |   |   |   |   |   |   |   |    |    |                               |    |    |    |    |    |       |         | 1  | 0.08 |
| A4TVB2_9PROT      | MmeA         |                   |   |   |   |   |   |   |   |   |    |    |                               |    |    |    |    |    |       |         | 0  | 0.00 |

| UniProt Accession | Protein name | <u>Eukaryotes</u> |   |   |   |   |   |   |   |   |    |    |    |    | <u>A</u> <u>Magnetotactic bacteria</u> |    |    |    |    | Count | % Match |      |
|-------------------|--------------|-------------------|---|---|---|---|---|---|---|---|----|----|----|----|----------------------------------------|----|----|----|----|-------|---------|------|
|                   |              | 1                 | 2 | 3 | 4 | 5 | 6 | 7 | 8 | 9 | 10 | 11 | 12 | 13 | 14                                     | 15 | 16 | 17 | 18 |       |         | 19   |
| R5Q0D6_9PROT      | MmeA         |                   |   |   |   |   |   |   |   |   |    |    |    |    |                                        |    |    |    |    |       | 0       | 0.00 |
| V6F7D9_9PROT      | MmeA         |                   |   |   |   |   |   |   |   |   |    |    |    |    |                                        |    |    |    |    |       | 0       | 0.00 |
| A0A0C2YPV4_MAGMG  | Mms6         |                   |   |   |   |   |   |   |   |   |    |    |    |    |                                        |    |    |    | x  | 0     | 0.00    |      |
| A0A0U5MJJ9_9PROT  | Mms6         |                   |   |   |   |   |   |   |   |   |    |    |    |    |                                        |    |    |    | x  | 0     | 0.00    |      |
| A0A1S7LCS1_9BACT  | Mms6         |                   |   |   |   |   |   |   |   |   |    |    |    |    |                                        |    |    | x  |    | 0     | 0.00    |      |
| Q3BKD2_9PROT      | Mms6         |                   |   |   |   |   |   |   |   |   |    |    |    |    |                                        |    |    |    |    | 0     | 0.00    |      |
| V6F5K9_9PROT      | Mms6         |                   |   |   |   |   |   |   |   |   |    |    |    |    |                                        |    |    |    |    | 0     | 0.00    |      |
| W6KB84_9PROT      | Mms6         |                   |   |   |   |   |   |   |   |   |    |    |    |    |                                        |    |    |    |    | 0     | 0.00    |      |
| W6KHG2_9PROT      | Mms6         |                   |   |   |   |   |   |   |   |   |    |    |    |    |                                        |    |    |    |    | 0     | 0.00    |      |
| A0A1S7LFH9_9BACT  | MmsF         |                   |   |   |   |   |   |   |   |   |    |    |    |    |                                        |    |    | x  |    | 0     | 0.00    |      |
| A4U547_9PROT      | MmsF         |                   |   |   |   |   |   |   |   |   |    |    |    |    |                                        |    |    |    |    | 0     | 0.00    |      |
| C4RAE5_9PROT      | MmsF         |                   |   |   |   |   |   |   |   |   |    |    |    |    |                                        |    |    |    |    | 0     | 0.00    |      |
| C4RAF0_9PROT      | MmsF         |                   |   |   |   |   |   |   |   |   |    |    |    |    |                                        |    |    |    |    | 0     | 0.00    |      |
| C5JBM3_9BACT      | MmsF         |                   |   |   |   |   |   |   |   |   |    |    |    |    |                                        |    |    |    |    | 0     | 0.00    |      |
| W0LMX0_9PROT      | MmsF         |                   |   |   |   |   |   |   |   |   |    |    |    |    |                                        |    |    |    |    | 0     | 0.00    |      |
| W6K8E4_9PROT      | MmsF         |                   |   |   |   |   |   |   |   |   |    |    |    |    |                                        |    |    |    |    | 0     | 0.00    |      |
| A0A0F2J2N0_9BACT  | Unknown      |                   |   |   |   | x |   |   |   | x |    |    |    |    |                                        |    |    |    |    | 2     | 0.15    |      |
| A0A0M9E139_9DELTA | Unknown      | x                 | x |   | x | x | x | x | x |   | x  | x  | x  |    |                                        |    | x  |    |    | 13    | 0.85    |      |
| A0A0M9E9F4_9DELTA | Unknown      |                   |   |   |   |   |   |   |   |   |    |    |    |    |                                        |    | x  |    |    | 0     | 0.00    |      |
| A0A0M9ECR7_9DELTA | Unknown      |                   |   |   |   |   |   |   |   |   | x  |    |    | x  |                                        |    | x  |    |    | 1     | 0.08    |      |
| U5IGM0_9DELTA     | Unknown      |                   |   |   |   |   |   |   |   |   |    |    |    |    |                                        |    |    |    |    | 0     | 0.00    |      |
| W0LJE4_9PROT      | Unknown      |                   |   |   |   |   |   |   |   |   |    |    |    |    |                                        |    |    | x  |    | 0     | 0.00    |      |
| W0LMZ2_9PROT      | Unknown      |                   |   |   |   |   |   |   |   |   |    |    |    |    |                                        |    |    | x  |    | 0     | 0.00    |      |
