# Supplementary material for: Conservation of magnetite biomineralization genes in all domains of life and implications for magnetic sensing
Source: PubMed Central journal article supplement (PMC8784154; doi:10.1073/pnas.2108655119), 2022-01-10
Supplement: pnas.2108655119.sd03.pdf [file pnas.2108655119.sd03.pdf]

**Dataset S3.** Summary of numbers of eukaryote and Lokiarchaeota genes with bidirectional BLASTp matches to distant homologs of magnetotactic bacteria (MTB) magnetosome-associated protein sequences. The number of reference sequences (No. Prot.) is listed for each of the 594 named prokaryote proteins (proteins named “Unknown” not shown). The 13 Eukaryote genomes considered are: (1) Panamanian leafcutter ant, *Acromyrmex echinator*, (2) honeybee, *Apis mellifera*, (3) roundworm, *Caenorhabditis elegans*, (4) fruit fly, *Drosophila melanogaster*, (5) California two-spot octopus, *Octopus bimaculoides*, (6) Little Brown Bat, *Myotis lucifugus*, (7) Chinook salmon, *Oncorhynchus tshawytscha*, (8) human, *Homo sapiens*, (9) naked mole-rat, *Heterocephalus glaber*, (10) mouse, *Mus musculus*, (11) Minke whale, *Balaenoptera acutorostrata scammoni*, (12) zebra finch, *Taeniopygia guttata*, and (13) zebrafish, *Danio rerio*. Column 14 is the asgard clade of Archaea Lokiarchaeota (A), and columns 15-19 are MTB: (15) *Candidatus magnetobacterium casensis*, (16) *Candidatus Magnetomorum* sp. HK-1, (17) *Magnetococcus marinus* MC-1, (18) *Magnetospirillum magneticum* AMB-1, and (19) *Magnetospirillum magnetotacticum* MS1. Taxonomic affinities for MTB are Nitrospirae (n=1), Deltaproteobacteria (n=1), and Alphaproteobacteria (n=3), respectively. See SI Appendix Table S2 for genome accession numbers, references, and additional details. The bidirectional BLASTp matches were filtered for  $E < 10e^{-3}$  in the eukaryote/Archaea to bacteria protein comparison.

| Gene        | <u>Eukaryotes</u> |          |          |          |          |          |          |          |          |          |          |          |          | <u>A</u> | <u>Magnetotactic Bacteria</u> |          |          |          |          | No. Prot. | % match Eukaryotes (of 13 genomes) |
|-------------|-------------------|----------|----------|----------|----------|----------|----------|----------|----------|----------|----------|----------|----------|----------|-------------------------------|----------|----------|----------|----------|-----------|------------------------------------|
|             | 1                 | 2        | 3        | 4        | 5        | 6        | 7        | 8        | 9        | 10       | 11       | 12       | 13       | 14       | 15                            | 16       | 17       | 18       | 19       |           |                                    |
| Dam21       | 0                 | 1        | 0        | 0        | 0        | 0        | 0        | 0        | 0        | 0        | 1        | 0        | 0        | 0        | 0                             | 0        | 0        | 0        | 0        | 1         | 0.15                               |
| Dam22       | 0                 | 0        | 0        | 0        | 0        | 0        | 0        | 0        | 0        | 0        | 0        | 0        | 0        | 0        | 0                             | 0        | 0        | 0        | 0        | 1         | 0.00                               |
| Dam28       | 0                 | 0        | 1        | 0        | 0        | 0        | 0        | 0        | 0        | 0        | 0        | 0        | 0        | 0        | 0                             | 0        | 0        | 0        | 0        | 1         | 0.08                               |
| FeoB        | 1                 | 0        | 0        | 1        | 0        | 0        | 1        | 0        | 0        | 0        | 0        | 1        | 1        | 0        | 0                             | 1        | 0        | 0        | 0        | 1         | 0.38                               |
| Mad1        | 0                 | 1        | 0        | 0        | 0        | 0        | 0        | 1        | 1        | 0        | 0        | 0        | 0        | 0        | 0                             | 1        | 0        | 0        | 0        | 3         | 0.23                               |
| Mad2        | 0                 | 0        | 0        | 0        | 0        | 0        | 1        | 0        | 0        | 0        | 0        | 0        | 0        | 0        | 1                             | 1        | 0        | 0        | 0        | 8         | 0.08                               |
| Mad4        | 0                 | 0        | 0        | 0        | 1        | 0        | 0        | 0        | 0        | 0        | 0        | 0        | 0        | 0        | 0                             | 1        | 0        | 0        | 0        | 3         | 0.08                               |
| Mad6        | 0                 | 0        | 0        | 0        | 0        | 0        | 0        | 0        | 0        | 0        | 1        | 0        | 0        | 1        | 2                             | 1        | 1        | 1        | 1        | 3         | 0.08                               |
| Mad7        | 0                 | 0        | 0        | 0        | 0        | 0        | 0        | 0        | 0        | 0        | 0        | 0        | 0        | 0        | 0                             | 1        | 0        | 0        | 0        | 3         | 0.00                               |
| Mad8        | 0                 | 0        | 0        | 0        | 0        | 0        | 0        | 0        | 0        | 0        | 0        | 0        | 0        | 0        | 0                             | 1        | 0        | 0        | 0        | 2         | 0.00                               |
| <b>Mad9</b> | <b>2</b>          | <b>2</b> | <b>2</b> | <b>1</b> | <b>2</b> | <b>2</b> | <b>1</b> | <b>1</b> | <b>1</b> | <b>1</b> | <b>1</b> | <b>1</b> | <b>1</b> | <b>1</b> | <b>2</b>                      | <b>1</b> | <b>2</b> | <b>2</b> | <b>3</b> | <b>3</b>  | <b>1.00</b>                        |
| Mad10       | 0                 | 0        | 0        | 1        | 1        | 0        | 3        | 0        | 1        | 0        | 1        | 0        | 0        | 0        | 1                             | 1        | 0        | 1        | 0        | 9         | 0.38                               |
| Mad11       | 0                 | 0        | 0        | 0        | 0        | 0        | 1        | 0        | 0        | 0        | 0        | 0        | 0        | 0        | 0                             | 1        | 0        | 0        | 0        | 5         | 0.08                               |
| Mad12       | 0                 | 0        | 0        | 0        | 0        | 0        | 0        | 0        | 0        | 0        | 0        | 0        | 0        | 0        | 0                             | 1        | 0        | 0        | 0        | 1         | 0.00                               |

| Gene         | <u>Eukaryotes</u> |          |          |          |          |          |          |          |          |          |          |          |          | <u>A</u> | <u>Magnetotactic Bacteria</u> |          |          |          |          | No. Prot. | % match Eukaryotes (of 13 genomes) |
|--------------|-------------------|----------|----------|----------|----------|----------|----------|----------|----------|----------|----------|----------|----------|----------|-------------------------------|----------|----------|----------|----------|-----------|------------------------------------|
|              | 1                 | 2        | 3        | 4        | 5        | 6        | 7        | 8        | 9        | 10       | 11       | 12       | 13       | 14       | 15                            | 16       | 17       | 18       | 19       |           |                                    |
| <b>Mad17</b> | <b>1</b>          | <b>2</b> | <b>2</b> | <b>1</b> | <b>2</b> | <b>2</b> | <b>2</b> | <b>1</b> | <b>2</b> | <b>1</b> | <b>2</b> | <b>2</b> | <b>1</b> | <b>1</b> | <b>1</b>                      | <b>1</b> | <b>1</b> | <b>1</b> | <b>1</b> | <b>4</b>  | <b>1.00</b>                        |
| Mad20        | 0                 | 0        | 0        | 0        | 0        | 1        | 0        | 0        | 1        | 0        | 1        | 0        | 1        | 0        | 0                             | 0        | 0        | 0        | 0        | 3         | 0.31                               |
| Mad21        | 0                 | 0        | 0        | 0        | 0        | 0        | 0        | 1        | 0        | 0        | 1        | 0        | 0        | 0        | 0                             | 0        | 0        | 0        | 0        | 2         | 0.15                               |
| Mad21-1      | 0                 | 1        | 0        | 0        | 0        | 1        | 0        | 1        | 1        | 1        | 1        | 0        | 0        | 0        | 0                             | 1        | 0        | 0        | 0        | 1         | 0.46                               |
| Mad22        | 1                 | 0        | 0        | 1        | 0        | 1        | 1        | 0        | 1        | 0        | 0        | 1        | 1        | 0        | 1                             | 1        | 0        | 0        | 0        | 3         | 0.54                               |
| Mad23        | 1                 | 1        | 2        | 3        | 1        | 0        | 2        | 0        | 2        | 2        | 2        | 0        | 2        | 1        | 1                             | 0        | 0        | 1        | 0        | 7         | 0.77                               |
| Mad23-1      | 1                 | 1        | 1        | 1        | 1        | 1        | 1        | 0        | 0        | 1        | 0        | 0        | 1        | 0        | 0                             | 1        | 0        | 0        | 0        | 1         | 0.69                               |
| Mad23-2      | 0                 | 0        | 0        | 0        | 0        | 0        | 0        | 0        | 0        | 0        | 0        | 0        | 0        | 0        | 0                             | 1        | 0        | 0        | 0        | 1         | 0.00                               |
| Mad23-I      | 0                 | 1        | 0        | 0        | 0        | 0        | 0        | 0        | 0        | 0        | 0        | 0        | 0        | 0        | 0                             | 0        | 0        | 0        | 0        | 1         | 0.08                               |
| Mad23-II     | 0                 | 0        | 0        | 0        | 0        | 0        | 1        | 0        | 0        | 1        | 0        | 0        | 0        | 0        | 1                             | 0        | 0        | 0        | 0        | 1         | 0.15                               |
| Mad24        | 1                 | 0        | 1        | 0        | 1        | 1        | 1        | 1        | 0        | 1        | 1        | 0        | 0        | 0        | 1                             | 1        | 0        | 1        | 0        | 8         | 0.62                               |
| Mad24-2      | 0                 | 0        | 0        | 0        | 0        | 1        | 0        | 1        | 1        | 0        | 1        | 1        | 1        | 0        | 0                             | 2        | 0        | 0        | 0        | 2         | 0.46                               |
| <b>Mad25</b> | <b>2</b>          | <b>1</b> | <b>1</b> | <b>1</b> | <b>2</b> | <b>4</b> | <b>1</b> | <b>3</b> | <b>1</b> | <b>1</b> | <b>3</b> | <b>1</b> | <b>2</b> | <b>1</b> | <b>1</b>                      | <b>1</b> | <b>0</b> | <b>0</b> | <b>0</b> | <b>8</b>  | <b>1.00</b>                        |
| Mad26        | 0                 | 1        | 0        | 0        | 2        | 1        | 1        | 0        | 1        | 1        | 0        | 2        | 1        | 0        | 1                             | 0        | 0        | 0        | 0        | 7         | 0.62                               |
| Mad26-1      | 0                 | 0        | 0        | 0        | 0        | 1        | 0        | 0        | 0        | 0        | 0        | 0        | 0        | 0        | 0                             | 1        | 0        | 0        | 0        | 1         | 0.08                               |
| Mad26-2      | 0                 | 0        | 0        | 1        | 0        | 0        | 1        | 0        | 0        | 0        | 1        | 0        | 0        | 0        | 0                             | 1        | 0        | 0        | 0        | 1         | 0.23                               |
| Mad27        | 1                 | 0        | 0        | 1        | 1        | 0        | 0        | 0        | 0        | 0        | 0        | 0        | 1        | 1        | 1                             | 0        | 0        | 0        | 0        | 1         | 0.31                               |
| Mad27-1      | 0                 | 0        | 1        | 1        | 1        | 1        | 1        | 1        | 1        | 1        | 1        | 1        | 1        | 0        | 0                             | 1        | 1        | 0        | 0        | 1         | 0.85                               |
| Mad27-2      | 0                 | 1        | 1        | 1        | 1        | 1        | 0        | 1        | 1        | 1        | 1        | 1        | 1        | 0        | 1                             | 1        | 0        | 1        | 1        | 1         | 0.85                               |
| Mad28        | 1                 | 0        | 0        | 1        | 0        | 1        | 1        | 0        | 1        | 1        | 1        | 0        | 0        | 0        | 1                             | 0        | 0        | 0        | 0        | 7         | 0.54                               |
| Mad28-1      | 0                 | 0        | 1        | 0        | 0        | 0        | 1        | 1        | 0        | 1        | 1        | 0        | 0        | 0        | 0                             | 1        | 0        | 0        | 0        | 3         | 0.38                               |
| Mad28-2      | 0                 | 2        | 0        | 1        | 1        | 0        | 1        | 0        | 0        | 1        | 1        | 1        | 1        | 0        | 1                             | 1        | 0        | 0        | 0        | 4         | 0.62                               |
| Mad28-3      | 0                 | 0        | 0        | 0        | 0        | 0        | 0        | 0        | 0        | 0        | 0        | 0        | 0        | 0        | 0                             | 0        | 0        | 0        | 0        | 1         | 0.00                               |
| Mad28-5      | 0                 | 0        | 0        | 0        | 0        | 0        | 0        | 0        | 1        | 0        | 0        | 0        | 0        | 0        | 0                             | 0        | 0        | 0        | 0        | 1         | 0.08                               |
| Mad28-6      | 0                 | 0        | 0        | 0        | 0        | 0        | 0        | 0        | 1        | 1        | 0        | 0        | 0        | 0        | 0                             | 0        | 0        | 0        | 0        | 1         | 0.15                               |
| <b>Mad29</b> | <b>2</b>          | <b>1</b> | <b>1</b> | <b>1</b> | <b>1</b> | <b>1</b> | <b>1</b> | <b>1</b> | <b>1</b> | <b>1</b> | <b>1</b> | <b>1</b> | <b>2</b> | <b>1</b> | <b>0</b>                      | <b>1</b> | <b>1</b> | <b>1</b> | <b>1</b> | <b>5</b>  | <b>1.00</b>                        |

| Gene        | <u>Eukaryotes</u> |          |          |          |          |          |          |          |          |          |          |          |          | <u>A</u> | <u>Magnetotactic Bacteria</u> |          |          |          |          | No. Prot. | % match Eukaryotes (of 13 genomes) |
|-------------|-------------------|----------|----------|----------|----------|----------|----------|----------|----------|----------|----------|----------|----------|----------|-------------------------------|----------|----------|----------|----------|-----------|------------------------------------|
|             | 1                 | 2        | 3        | 4        | 5        | 6        | 7        | 8        | 9        | 10       | 11       | 12       | 13       | 14       | 15                            | 16       | 17       | 18       | 19       |           |                                    |
| Mad29-1     | 0                 | 0        | 0        | 0        | 0        | 1        | 0        | 0        | 1        | 0        | 0        | 1        | 0        | 0        | 0                             | 0        | 0        | 0        | 0        | 1         | 0.23                               |
| Mad29-2     | 0                 | 0        | 0        | 0        | 0        | 0        | 0        | 0        | 0        | 0        | 0        | 0        | 0        | 1        | 1                             | 0        | 0        | 0        | 0        | 1         | 0.00                               |
| Mad30       | 0                 | 0        | 0        | 0        | 0        | 0        | 1        | 1        | 0        | 0        | 0        | 0        | 0        | 1        | 1                             | 1        | 0        | 2        | 2        | 7         | 0.15                               |
| Mad31       | 0                 | 0        | 0        | 0        | 0        | 0        | 0        | 0        | 0        | 0        | 0        | 0        | 0        | 0        | 1                             | 1        | 0        | 0        | 0        | 7         | 0.00                               |
| <b>MamA</b> | <b>5</b>          | <b>2</b> | <b>2</b> | <b>5</b> | <b>1</b> | <b>6</b> | <b>6</b> | <b>6</b> | <b>4</b> | <b>7</b> | <b>6</b> | <b>6</b> | <b>8</b> | <b>3</b> | <b>3</b>                      | <b>2</b> | <b>3</b> | <b>2</b> | <b>2</b> | <b>42</b> | <b>1.00</b>                        |
| MamA*       | 0                 | 0        | 0        | 0        | 0        | 0        | 0        | 0        | 0        | 0        | 0        | 0        | 0        | 0        | 0                             | 0        | 0        | 0        | 0        | 1         | 0.00                               |
| <b>MamB</b> | <b>2</b>          | <b>2</b> | <b>3</b> | <b>1</b> | <b>1</b> | <b>1</b> | <b>2</b> | <b>2</b> | <b>3</b> | <b>3</b> | <b>2</b> | <b>3</b> | <b>2</b> | <b>0</b> | <b>1</b>                      | <b>1</b> | <b>1</b> | <b>1</b> | <b>1</b> | <b>42</b> | <b>1.00</b>                        |
| MamB-1      | 0                 | 0        | 0        | 0        | 0        | 0        | 0        | 0        | 0        | 0        | 0        | 0        | 0        | 1        | 0                             | 0        | 0        | 0        | 0        | 1         | 0.00                               |
| MamB-2      | 0                 | 0        | 0        | 0        | 0        | 0        | 0        | 0        | 0        | 0        | 0        | 0        | 0        | 0        | 0                             | 0        | 0        | 0        | 0        | 1         | 0.00                               |
| MamB*       | 0                 | 0        | 0        | 0        | 0        | 0        | 0        | 0        | 0        | 0        | 0        | 0        | 0        | 0        | 0                             | 1        | 0        | 0        | 0        | 1         | 0.00                               |
| MamC        | 0                 | 0        | 0        | 0        | 0        | 0        | 0        | 0        | 0        | 0        | 0        | 0        | 0        | 0        | 0                             | 0        | 1        | 1        | 1        | 8         | 0.00                               |
| MamD        | 0                 | 0        | 0        | 0        | 0        | 0        | 0        | 0        | 0        | 0        | 0        | 0        | 0        | 0        | 0                             | 0        | 1        | 1        | 1        | 8         | 0.00                               |
| MamD-like   | 0                 | 0        | 0        | 0        | 0        | 0        | 0        | 0        | 0        | 0        | 0        | 0        | 0        | 0        | 0                             | 0        | 0        | 1        | 0        | 3         | 0.00                               |
| <b>MamE</b> | <b>1</b>          | <b>1</b> | <b>6</b> | <b>1</b> | <b>3</b> | <b>1</b> | <b>2</b> | <b>2</b> | <b>2</b> | <b>2</b> | <b>1</b> | <b>2</b> | <b>3</b> | <b>0</b> | <b>2</b>                      | <b>1</b> | <b>1</b> | <b>2</b> | <b>2</b> | <b>26</b> | <b>1.00</b>                        |
| MamE-Cter   | 2                 | 1        | 2        | 1        | 1        | 1        | 0        | 1        | 1        | 1        | 0        | 1        | 1        | 0        | 0                             | 2        | 1        | 0        | 0        | 3         | 0.85                               |
| MamE-Nter   | 0                 | 0        | 0        | 0        | 0        | 0        | 0        | 0        | 0        | 0        | 0        | 0        | 0        | 0        | 0                             | 3        | 0        | 0        | 0        | 3         | 0.00                               |
| MamE'       | 0                 | 0        | 1        | 0        | 0        | 0        | 0        | 0        | 0        | 0        | 0        | 0        | 0        | 0        | 0                             | 0        | 0        | 0        | 0        | 1         | 0.08                               |
| MamE*       | 0                 | 0        | 0        | 0        | 0        | 0        | 0        | 0        | 0        | 0        | 0        | 0        | 0        | 0        | 0                             | 0        | 0        | 0        | 0        | 1         | 0.00                               |
| MamEO       | 1                 | 0        | 0        | 1        | 0        | 0        | 0        | 0        | 0        | 0        | 0        | 0        | 0        | 0        | 0                             | 0        | 0        | 0        | 0        | 1         | 0.15                               |
| MamEO-Cter  | 0                 | 0        | 1        | 0        | 0        | 0        | 0        | 0        | 0        | 0        | 0        | 0        | 0        | 0        | 0                             | 0        | 0        | 0        | 0        | 1         | 0.08                               |
| MamEO-Nter  | 0                 | 0        | 0        | 0        | 0        | 0        | 1        | 0        | 0        | 0        | 0        | 0        | 1        | 0        | 0                             | 1        | 0        | 0        | 0        | 1         | 0.15                               |
| MamF        | 0                 | 0        | 0        | 0        | 0        | 0        | 0        | 0        | 0        | 0        | 0        | 1        | 0        | 0        | 0                             | 1        | 2        | 3        | 2        | 13        | 0.08                               |
| MamG-like   | 0                 | 0        | 0        | 0        | 0        | 0        | 0        | 0        | 0        | 0        | 0        | 0        | 0        | 0        | 0                             | 0        | 0        | 0        | 1        | 1         | 0.00                               |
| <b>MamH</b> | <b>3</b>          | <b>2</b> | <b>3</b> | <b>3</b> | <b>3</b> | <b>2</b> | <b>5</b> | <b>6</b> | <b>3</b> | <b>4</b> | <b>4</b> | <b>3</b> | <b>3</b> | <b>2</b> | <b>2</b>                      | <b>0</b> | <b>1</b> | <b>1</b> | <b>1</b> | <b>9</b>  | <b>1.00</b>                        |
| MamI        | 0                 | 0        | 0        | 0        | 0        | 0        | 0        | 0        | 0        | 0        | 0        | 0        | 0        | 0        | 1                             | 0        | 1        | 0        | 0        | 2         | 0.00                               |
| MamI-2      | 0                 | 0        | 0        | 0        | 0        | 0        | 0        | 0        | 0        | 0        | 0        | 0        | 0        | 0        | 0                             | 1        | 0        | 1        | 1        | 3         | 0.00                               |



| Gene        | <u>Eukaryotes</u> |          |          |          |          |          |          |          |          |          |          |          |          | <u>A</u> | <u>Magnetotactic Bacteria</u> |          |          |          |          | No. Prot. | % match Eukaryotes (of 13 genomes) |
|-------------|-------------------|----------|----------|----------|----------|----------|----------|----------|----------|----------|----------|----------|----------|----------|-------------------------------|----------|----------|----------|----------|-----------|------------------------------------|
|             | 1                 | 2        | 3        | 4        | 5        | 6        | 7        | 8        | 9        | 10       | 11       | 12       | 13       | 14       | 15                            | 16       | 17       | 18       | 19       |           |                                    |
| MamU        | 1                 | 1        | 1        | 0        | 1        | 1        | 0        | 1        | 1        | 1        | 1        | 1        | 2        | 1        | 1                             | 0        | 0        | 2        | 2        | 4         | 0.85                               |
| MamV        | 0                 | 0        | 0        | 0        | 0        | 0        | 0        | 0        | 0        | 0        | 1        | 0        | 0        | 0        | 0                             | 0        | 0        | 1        | 1        | 1         | 0.08                               |
| MamW        | 0                 | 0        | 0        | 0        | 0        | 0        | 0        | 0        | 1        | 0        | 0        | 0        | 0        | 0        | 0                             | 0        | 0        | 1        | 1        | 4         | 0.08                               |
| MamX        | 1                 | 1        | 0        | 1        | 0        | 1        | 1        | 0        | 0        | 0        | 0        | 0        | 0        | 0        | 0                             | 0        | 1        | 1        | 1        | 8         | 0.38                               |
| MamY        | 0                 | 0        | 0        | 1        | 1        | 0        | 0        | 0        | 0        | 0        | 0        | 1        | 0        | 0        | 0                             | 1        | 0        | 1        | 1        | 5         | 0.23                               |
| Man1        | 0                 | 0        | 0        | 0        | 0        | 0        | 1        | 1        | 0        | 0        | 0        | 0        | 1        | 0        | 1                             | 0        | 0        | 0        | 0        | 5         | 0.23                               |
| Man4        | 0                 | 0        | 0        | 1        | 0        | 1        | 1        | 1        | 3        | 2        | 1        | 1        | 1        | 0        | 1                             | 0        | 0        | 0        | 0        | 5         | 0.69                               |
| Man5        | 0                 | 0        | 0        | 2        | 0        | 1        | 1        | 1        | 0        | 0        | 0        | 1        | 1        | 0        | 1                             | 0        | 0        | 0        | 0        | 5         | 0.46                               |
| Man5-Cter   | 0                 | 0        | 0        | 0        | 0        | 1        | 0        | 1        | 0        | 0        | 0        | 0        | 0        | 0        | 0                             | 0        | 0        | 0        | 0        | 1         | 0.15                               |
| <b>Man6</b> | <b>1</b>          | <b>4</b> | <b>3</b> | <b>0</b> | <b>1</b> | <b>2</b> | <b>3</b> | <b>3</b> | <b>2</b> | <b>2</b> | <b>2</b> | <b>3</b> | <b>1</b> | <b>1</b> | <b>1</b>                      | <b>2</b> | <b>0</b> | <b>0</b> | <b>0</b> | <b>5</b>  | <b>0.92</b>                        |
| MmeA        | 0                 | 0        | 0        | 0        | 0        | 0        | 1        | 0        | 0        | 0        | 0        | 0        | 0        | 0        | 0                             | 0        | 0        | 1        | 1        | 4         | 0.08                               |
| Mms6        | 0                 | 0        | 0        | 0        | 0        | 0        | 0        | 0        | 0        | 0        | 0        | 0        | 0        | 0        | 0                             | 0        | 1        | 1        | 1        | 7         | 0.00                               |
| MmsF        | 0                 | 0        | 0        | 0        | 0        | 0        | 0        | 0        | 0        | 0        | 0        | 0        | 0        | 0        | 0                             | 0        | 1        | 0        | 0        | 7         | 0.00                               |
