# Supplementary material for: Conservation of magnetite biomineralization genes in all domains of life and implications for magnetic sensing
Source: PubMed Central journal article supplement (PMC8784154; doi:10.1073/pnas.2108655119), 2022-01-10
Supplement: pnas.2108655119.sd06.pdf [file pnas.2108655119.sd06.pdf]

**Dataset 6.** The complete repertoire (homologs and paralogs) of zebrafish (*Danio rerio*) and Chinook salmon (*Oncorhynchus tshawytscha*) genes encoding 11 ‘universally conserved’ uMGH proteins. The Chinook salmon genes were matched to zebrafish orthologs in order to identify Zebrafish Information Network gene codes (see Methods). The Protein ANalysis THrough Evolutionary Relationships Protein Classes are based on the 2020\_04 release of “ReferenceProteome” dataset. The salmon accessions are available from the National Center for Bioinformatic Information (Accession GCF\_002872995.1), while zebrafish accessions are available from ENSEMBL genome version GRCz11, file ‘Danio\_rerio.GRCz11.pep.all.fa.

| uMGH Category | ZFIN gene code       | PANTHER protein class              | Accession      | Fish           |
|---------------|----------------------|------------------------------------|----------------|----------------|
| MamA          | ZDB-GENE-040426-928  | -                                  | XP_024228601.1 | Chinook salmon |
| MamK          | ZDB-GENE-070410-58   | -                                  | XP_024228727.1 | Chinook salmon |
| MamN          | ZDB-GENE-070424-71   | secondary carrier transporter      | XP_024228764.1 | Chinook salmon |
| MamK          | ZDB-GENE-041121-7    | actin and actin related protein    | XP_024229240.1 | Chinook salmon |
| MamA          | ZDB-GENE-030131-2527 | -                                  | XP_024229660.1 | Chinook salmon |
| MamA          | ZDB-GENE-070705-219  | -                                  | XP_024229808.1 | Chinook salmon |
| Man6          | ZDB-GENE-021226-1    | extracellular matrix protein       | XP_024229830.1 | Chinook salmon |
| MamA          | ZDB-GENE-030616-630  | chaperone                          | XP_024229852.1 | Chinook salmon |
| MamA          | ZDB-GENE-120727-22   | protein modifying enzyme           | XP_024230054.1 | Chinook salmon |
| MamA          | ZDB-GENE-070209-29   | protein-binding activity modulator | XP_024230099.1 | Chinook salmon |
| MamE          | ZDB-GENE-030519-2    | -                                  | XP_024230496.1 | Chinook salmon |
| MamE          | ZDB-GENE-030616-572  | scaffold/adaptor protein           | XP_024230731.1 | Chinook salmon |
| MamK          | ZDB-GENE-040426-2877 | actin and actin related protein    | XP_024230997.1 | Chinook salmon |
| MamH          | ZDB-GENE-040718-380  | secondary carrier transporter      | XP_024231796.1 | Chinook salmon |
| MamB          | ZDB-GENE-041210-158  | -                                  | XP_024232636.1 | Chinook salmon |
| Man6          | ZDB-GENE-021226-1    | extracellular matrix protein       | XP_024232688.1 | Chinook salmon |
| MamN          | ZDB-GENE-070424-71   | secondary carrier transporter      | XP_024232770.1 | Chinook salmon |
| MamA          | ZDB-GENE-070705-219  | -                                  | XP_024232821.1 | Chinook salmon |
| MamA          | ZDB-GENE-040426-928  | -                                  | XP_024232920.1 | Chinook salmon |
| Man6          | ZDB-GENE-030131-7905 | -                                  | XP_024233250.1 | Chinook salmon |
| MamB          | ZDB-GENE-040426-1840 | -                                  | XP_024233478.1 | Chinook salmon |

| uMGH Category  | ZFIN gene code       | PANTHER protein class             | Accession      | Fish           |
|----------------|----------------------|-----------------------------------|----------------|----------------|
| MamA           | ZDB-GENE-040426-694  | RNA splicing factor               | XP_024233544.1 | Chinook salmon |
| Mad25/M<br>an6 | ZDB-GENE-060118-1    | extracellular matrix protein      | XP_024233678.1 | Chinook salmon |
| MamA           | ZDB-GENE-080722-25   | -                                 | XP_024233785.1 | Chinook salmon |
| MamH           | ZDB-GENE-041210-308  | -                                 | XP_024234123.1 | Chinook salmon |
| MamK           | ZDB-GENE-040625-35   | actin and actin related protein   | XP_024234289.1 | Chinook salmon |
| MamK           | ZDB-GENE-040520-4    | actin and actin related protein   | XP_024234338.1 | Chinook salmon |
| MamA           | ZDB-GENE-030131-9443 | -                                 | XP_024234369.1 | Chinook salmon |
| MamA           | ZDB-GENE-060126-2    | -                                 | XP_024234753.1 | Chinook salmon |
| MamA           | ZDB-GENE-050208-116  | chaperone                         | XP_024235293.1 | Chinook salmon |
| MamA           | ZDB-GENE-030131-514  | chaperone                         | XP_024235350.1 | Chinook salmon |
| MamA           | ZDB-GENE-041210-299  | protein modifying enzyme          | XP_024235642.1 | Chinook salmon |
| MamK           | ZDB-GENE-041111-251  | GTPase-activating protein         | XP_024235815.1 | Chinook salmon |
| MamA           | ZDB-GENE-061221-2    | -                                 | XP_024235847.1 | Chinook salmon |
| MamK           | ZDB-GENE-040520-4    | actin and actin related protein   | XP_024235880.1 | Chinook salmon |
| Mad25          | ZDB-GENE-121214-181  | membrane traffic protein          | XP_024236113.1 | Chinook salmon |
| MamK           | ZDB-GENE-031001-11   | -                                 | XP_024236220.1 | Chinook salmon |
| MamA           | ZDB-GENE-110203-5    | -                                 | XP_024236246.1 | Chinook salmon |
| Man6           | ZDB-GENE-030131-3404 | -                                 | XP_024236304.1 | Chinook salmon |
| Mad17          | ZDB-GENE-030131-8767 | -                                 | XP_024236389.1 | Chinook salmon |
| MamK           | ZDB-GENE-040426-2695 | actin and actin related protein   | XP_024237762.1 | Chinook salmon |
| MamA           | ZDB-GENE-040704-72   | -                                 | XP_024237889.1 | Chinook salmon |
| MamE           | ZDB-GENE-091118-27   | cytoskeletal protein              | XP_024237920.1 | Chinook salmon |
| MamE           | ZDB-GENE-091118-27   | cytoskeletal protein              | XP_024237967.1 | Chinook salmon |
| MamE           | ZDB-GENE-070925-2    | tight junction                    | XP_024238050.1 | Chinook salmon |
| MamE           | ZDB-GENE-040426-2544 | cell junction protein             | XP_024238242.1 | Chinook salmon |
| MamA           | ZDB-GENE-030131-8303 | ubiquitin-protein ligase          | XP_024238318.1 | Chinook salmon |
| MamE           | ZDB-GENE-030131-6959 | guanyl-nucleotide exchange factor | XP_024238901.1 | Chinook salmon |

| uMGH Category | ZFIN gene code       | PANTHER protein class                                                                      | Accession      | Fish           |
|---------------|----------------------|--------------------------------------------------------------------------------------------|----------------|----------------|
| MamB          | ZDB-GENE-040724-254  | transporter                                                                                | XP_024239008.1 | Chinook salmon |
| MamE          | ZDB-GENE-080520-2    | -                                                                                          | XP_024239312.1 | Chinook salmon |
| MamA          | ZDB-GENE-030313-1    | -                                                                                          | XP_024239706.1 | Chinook salmon |
| Mad17         | ZDB-GENE-030131-2209 | -                                                                                          | XP_024240635.1 | Chinook salmon |
| MamK          | ZDB-GENE-040426-1221 | -                                                                                          | XP_024241239.1 | Chinook salmon |
| MamA          | ZDB-GENE-121214-233  | -                                                                                          | XP_024242067.1 | Chinook salmon |
| MamA          | ZDB-GENE-121214-233  | -                                                                                          | XP_024242233.1 | Chinook salmon |
| MamA          | ZDB-GENE-121214-248  | -                                                                                          | XP_024242234.1 | Chinook salmon |
| MamE          | ZDB-GENE-080219-7    | serine protease                                                                            | XP_024242286.1 | Chinook salmon |
| MamE          | ZDB-GENE-090313-191  | cytoskeletal protein                                                                       | XP_024242489.1 | Chinook salmon |
| MamA          | ZDB-GENE-030131-2963 | ubiquitin-protein ligase                                                                   | XP_024242638.1 | Chinook salmon |
| Mad29         | ZDB-GENE-051023-10   | -                                                                                          | XP_024242659.1 | Chinook salmon |
| MamE          | ZDB-GENE-121019-1    | -                                                                                          | XP_024242820.1 | Chinook salmon |
| MamE          | ZDB-GENE-080219-7    | serine protease                                                                            | XP_024243445.1 | Chinook salmon |
| MamA          | ZDB-GENE-121214-233  | -                                                                                          | XP_024243502.1 | Chinook salmon |
| MamA          | ZDB-GENE-060130-180  | -                                                                                          | XP_024243879.1 | Chinook salmon |
| MamK          | ZDB-GENE-040520-4    | actin and actin related protein<br>chromatin/chromatin-binding, or -<br>regulatory protein | XP_024243910.1 | Chinook salmon |
| MamA          | ZDB-GENE-081105-56   | actin and actin related protein                                                            | XP_024244156.1 | Chinook salmon |
| MamK          | ZDB-GENE-030131-1229 | actin and actin related protein                                                            | XP_024244208.1 | Chinook salmon |
| MamN/M<br>amE | ZDB-GENE-040724-161  | -                                                                                          | XP_024244227.1 | Chinook salmon |
| MamA          | ZDB-GENE-051113-132  | ubiquitin-protein ligase                                                                   | XP_024244419.1 | Chinook salmon |
| MamA          | ZDB-GENE-070912-148  | -                                                                                          | XP_024244429.1 | Chinook salmon |
| MamK          | ZDB-GENE-070424-10   | actin and actin related protein                                                            | XP_024244528.1 | Chinook salmon |
| MamA          | ZDB-GENE-130530-956  | -                                                                                          | XP_024244642.1 | Chinook salmon |
| MamA          | ZDB-GENE-031010-34   | -                                                                                          | XP_024244693.1 | Chinook salmon |
| MamA          | ZDB-GENE-081105-56   | chromatin/chromatin-binding, or -<br>regulatory protein                                    | XP_024244916.1 | Chinook salmon |
| MamE          | ZDB-GENE-031222-1    | -                                                                                          | XP_024245149.1 | Chinook salmon |

| uMGH Category | ZFIN gene code       | PANTHER protein class                        | Accession      | Fish           |
|---------------|----------------------|----------------------------------------------|----------------|----------------|
| MamA          | ZDB-GENE-990706-2    | ubiquitin-protein ligase                     | XP_024245781.1 | Chinook salmon |
| MamE          | ZDB-GENE-081031-78   | -                                            | XP_024245876.1 | Chinook salmon |
| MamA          | ZDB-GENE-040426-2483 | chaperone                                    | XP_024245916.1 | Chinook salmon |
| MamA          | ZDB-GENE-080208-7    | nucleic acid metabolism protein              | XP_024246188.1 | Chinook salmon |
| MamA          | ZDB-GENE-030131-5395 | -                                            | XP_024246210.1 | Chinook salmon |
| MamA          | ZDB-GENE-040426-1169 | -                                            | XP_024246655.1 | Chinook salmon |
| MamA          | ZDB-GENE-041114-56   | -                                            | XP_024246929.1 | Chinook salmon |
| Mad25         | ZDB-GENE-100712-2    | non-receptor serine/threonine protein kinase | XP_024247085.1 | Chinook salmon |
| MamB          | ZDB-GENE-030131-5556 | non-receptor serine/threonine protein kinase | XP_024247301.1 | Chinook salmon |
| Man6          | ZDB-GENE-021226-3    | extracellular matrix protein                 | XP_024247452.1 | Chinook salmon |
| Man6          | ZDB-GENE-110222-3    | extracellular matrix protein                 | XP_024247454.1 | Chinook salmon |
| MamE          | ZDB-GENE-050302-100  | -                                            | XP_024247912.1 | Chinook salmon |
| Man6          | ZDB-GENE-030131-9823 | extracellular matrix protein                 | XP_024248018.1 | Chinook salmon |
| MamA          | ZDB-GENE-031010-34   | -                                            | XP_024248039.1 | Chinook salmon |
| MamE          | ZDB-GENE-030616-572  | scaffold/adaptor protein                     | XP_024248149.1 | Chinook salmon |
| MamA          | ZDB-GENE-070209-29   | protein-binding activity modulator           | XP_024248357.1 | Chinook salmon |
| MamA          | ZDB-GENE-120727-22   | protein modifying enzyme                     | XP_024248389.1 | Chinook salmon |
| MamA          | ZDB-GENE-091204-117  | -                                            | XP_024248834.1 | Chinook salmon |
| MamK          | ZDB-GENE-990415-92   | -                                            | XP_024249523.1 | Chinook salmon |
| MamA          | ZDB-GENE-040426-1169 | -                                            | XP_024249903.1 | Chinook salmon |
| MamA          | ZDB-GENE-041121-17   | -                                            | XP_024250284.1 | Chinook salmon |
| MamA          | ZDB-GENE-040426-866  | ubiquitin-protein ligase                     | XP_024250483.1 | Chinook salmon |
| MamH          | ZDB-GENE-030131-2165 | DNA-binding transcription factor             | XP_024251066.1 | Chinook salmon |
| MamE          | ZDB-GENE-031006-7    | -                                            | XP_024251777.1 | Chinook salmon |
| Mad29         | ZDB-GENE-040625-120  | transporter                                  | XP_024252163.1 | Chinook salmon |
| MamK          | ZDB-GENE-040426-2894 | actin and actin related protein              | XP_024252418.1 | Chinook salmon |
| MamA          | ZDB-GENE-050417-350  | microtubule binding motor protein            | XP_024252526.1 | Chinook salmon |

| uMGH Category | ZFIN gene code       | PANTHER protein class                        | Accession      | Fish           |
|---------------|----------------------|----------------------------------------------|----------------|----------------|
| MamA          | ZDB-GENE-040704-72   | -                                            | XP_024252588.1 | Chinook salmon |
| MamK          | ZDB-GENE-040426-2695 | actin and actin related protein              | XP_024252934.1 | Chinook salmon |
| MamB          | ZDB-GENE-040718-6    | -                                            | XP_024253167.1 | Chinook salmon |
| MamK          | ZDB-GENE-031001-11   | -                                            | XP_024253253.1 | Chinook salmon |
| MamE          | ZDB-GENE-060531-24   | -                                            | XP_024253264.1 | Chinook salmon |
| MamA          | ZDB-GENE-110203-5    | -                                            | XP_024253278.1 | Chinook salmon |
| Mad17         | ZDB-GENE-030131-8767 | -                                            | XP_024253384.1 | Chinook salmon |
| MamA          | ZDB-GENE-040426-866  | ubiquitin-protein ligase                     | XP_024253574.1 | Chinook salmon |
| MamA          | ZDB-GENE-041121-17   | -                                            | XP_024253745.1 | Chinook salmon |
| Mad9          | ZDB-GENE-040426-2153 | oxidoreductase                               | XP_024254386.1 | Chinook salmon |
| Mad9          | ZDB-GENE-040426-1995 | -                                            | XP_024254617.1 | Chinook salmon |
| MamA          | ZDB-GENE-120727-22   | protein modifying enzyme                     | XP_024255636.1 | Chinook salmon |
| MamA          | ZDB-GENE-000831-4    | -                                            | XP_024255720.1 | Chinook salmon |
| MamA          | ZDB-GENE-141219-15   | -                                            | XP_024255819.1 | Chinook salmon |
| Mad25         | ZDB-GENE-030115-3    | non-receptor serine/threonine protein kinase | XP_024255941.1 | Chinook salmon |
| MamA          | ZDB-GENE-040426-1599 | microtubule binding motor protein            | XP_024256032.1 | Chinook salmon |
| MamA          | ZDB-GENE-090429-2    | -                                            | XP_024256802.1 | Chinook salmon |
| MamA          | ZDB-GENE-110203-5    | -                                            | XP_024256927.1 | Chinook salmon |
| MamE          | ZDB-GENE-060531-24   | -                                            | XP_024256947.1 | Chinook salmon |
| MamK          | ZDB-GENE-031001-11   | -                                            | XP_024256954.1 | Chinook salmon |
| MamA          | ZDB-GENE-120727-22   | protein modifying enzyme                     | XP_024257062.1 | Chinook salmon |
| MamA          | ZDB-GENE-070209-29   | protein-binding activity modulator           | XP_024257091.1 | Chinook salmon |
| MamA          | ZDB-GENE-040426-2483 | chaperone                                    | XP_024257292.1 | Chinook salmon |
| MamA          | ZDB-GENE-000831-4    | -                                            | XP_024257505.1 | Chinook salmon |
| MamA          | ZDB-GENE-041010-223  | -                                            | XP_024257612.1 | Chinook salmon |
| MamE          | ZDB-GENE-130530-682  | -                                            | XP_024257776.1 | Chinook salmon |
| MamA          | ZDB-GENE-070209-29   | protein-binding activity modulator           | XP_024257788.1 | Chinook salmon |

| uMGH Category | ZFIN gene code       | PANTHER protein class           | Accession      | Fish           |
|---------------|----------------------|---------------------------------|----------------|----------------|
| Man6          | ZDB-GENE-060503-341  | histone modifying enzyme        | XP_024257807.1 | Chinook salmon |
| MamE          | ZDB-GENE-050302-100  | -                               | XP_024257967.1 | Chinook salmon |
| MamA          | ZDB-GENE-040426-1849 | chaperone                       | XP_024258320.1 | Chinook salmon |
| MamE          | ZDB-GENE-030131-3200 | -                               | XP_024258450.1 | Chinook salmon |
| MamE          | ZDB-GENE-030131-3200 | -                               | XP_024258640.1 | Chinook salmon |
| MamA          | ZDB-GENE-051113-132  | ubiquitin-protein ligase        | XP_024258785.1 | Chinook salmon |
| MamA          | ZDB-GENE-030131-2527 | -                               | XP_024258863.1 | Chinook salmon |
| MamK          | ZDB-GENE-070424-10   | actin and actin related protein | XP_024259230.1 | Chinook salmon |
| MamE          | ZDB-GENE-070925-1    | tight junction                  | XP_024259264.1 | Chinook salmon |
| MamK          | ZDB-GENE-081105-139  | transmembrane signal receptor   | XP_024259359.1 | Chinook salmon |
| MamK          | ZDB-GENE-081105-139  | transmembrane signal receptor   | XP_024259365.1 | Chinook salmon |
| MamK          | ZDB-GENE-081105-147  | transmembrane signal receptor   | XP_024259367.1 | Chinook salmon |
| MamK          | ZDB-GENE-040520-4    | actin and actin related protein | XP_024259889.1 | Chinook salmon |
| MamE          | ZDB-GENE-031001-2    | tight junction                  | XP_024259973.1 | Chinook salmon |
| MamA          | ZDB-GENE-130530-956  | -                               | XP_024260166.1 | Chinook salmon |
| MamA          | ZDB-GENE-090312-172  | chaperone                       | XP_024260758.1 | Chinook salmon |
| MamA          | ZDB-GENE-030131-9443 | -                               | XP_024260963.1 | Chinook salmon |
| Mad9          | ZDB-GENE-040426-1995 | -                               | XP_024261034.1 | Chinook salmon |
| Mad17         | ZDB-GENE-030131-5063 | G-protein                       | XP_024261105.1 | Chinook salmon |
| Mad25         | ZDB-GENE-121214-181  | membrane traffic protein        | XP_024262540.1 | Chinook salmon |
| MamE          | ZDB-GENE-030616-129  | -                               | XP_024262865.1 | Chinook salmon |
| MamE          | ZDB-GENE-030616-129  | -                               | XP_024262951.1 | Chinook salmon |
| MamN/MamE     | ZDB-GENE-091113-42   | -                               | XP_024263273.1 | Chinook salmon |
| MamE          | ZDB-GENE-040426-1529 | scaffold/adaptor protein        | XP_024263285.1 | Chinook salmon |
| MamA          | ZDB-GENE-101021-4    | ubiquitin-protein ligase        | XP_024263382.1 | Chinook salmon |
| MamA          | ZDB-GENE-081104-93   | scaffold/adaptor protein        | XP_024264166.1 | Chinook salmon |
| MamA          | ZDB-GENE-030131-574  | -                               | XP_024264486.1 | Chinook salmon |

| uMGH Category | ZFIN gene code       | PANTHER protein class                                                                | Accession      | Fish           |
|---------------|----------------------|--------------------------------------------------------------------------------------|----------------|----------------|
| MamE          | ZDB-GENE-090313-354  | -                                                                                    | XP_024264568.1 | Chinook salmon |
| Mad17         | ZDB-GENE-041114-12   | RNA methyltransferase                                                                | XP_024264670.1 | Chinook salmon |
| MamA          | ZDB-GENE-030131-8173 | primary active transporter                                                           | XP_024264851.1 | Chinook salmon |
| MamK          | ZDB-GENE-000329-3    | actin and actin related protein                                                      | XP_024264891.1 | Chinook salmon |
| MamA          | ZDB-GENE-051120-15   | -                                                                                    | XP_024265145.1 | Chinook salmon |
| MamE          | ZDB-GENE-031222-1    | -                                                                                    | XP_024265159.1 | Chinook salmon |
| MamB          | ZDB-GENE-041014-347  | transporter                                                                          | XP_024266292.1 | Chinook salmon |
| Mad29         | ZDB-GENE-040625-120  | transporter                                                                          | XP_024266660.1 | Chinook salmon |
| MamA          | ZDB-GENE-030131-2963 | ubiquitin-protein ligase                                                             | XP_024266832.1 | Chinook salmon |
| Mad29         | ZDB-GENE-040625-120  | transporter                                                                          | XP_024267302.1 | Chinook salmon |
| Mad17         | ZDB-GENE-040426-2317 | -                                                                                    | XP_024267358.1 | Chinook salmon |
| MamB          | ZDB-GENE-030131-5650 | -                                                                                    | XP_024267897.1 | Chinook salmon |
| MamA          | ZDB-GENE-010319-27   | -                                                                                    | XP_024268035.1 | Chinook salmon |
| MamN/M<br>amE | ZDB-GENE-080430-1    | -                                                                                    | XP_024268223.1 | Chinook salmon |
| MamB          | ZDB-GENE-131127-443  | G-protein coupled receptor                                                           | XP_024268465.1 | Chinook salmon |
| Mad29         | ZDB-GENE-040718-140  | -                                                                                    | XP_024268606.1 | Chinook salmon |
| MamA          | ZDB-GENE-070105-3    | -                                                                                    | XP_024268633.1 | Chinook salmon |
| MamA          | ZDB-GENE-030131-514  | chaperone                                                                            | XP_024268889.1 | Chinook salmon |
| MamA          | ZDB-GENE-050417-158  | -                                                                                    | XP_024268915.1 | Chinook salmon |
| MamA          | ZDB-GENE-050208-116  | chaperone                                                                            | XP_024269300.1 | Chinook salmon |
| MamK          | ZDB-GENE-040520-4    | actin and actin related protein                                                      | XP_024269370.1 | Chinook salmon |
| MamK          | ZDB-GENE-040520-4    | actin and actin related protein                                                      | XP_024269756.1 | Chinook salmon |
| MamB          | ZDB-GENE-041014-347  | transporter                                                                          | XP_024270396.1 | Chinook salmon |
| MamA          | ZDB-GENE-041010-223  | -                                                                                    | XP_024270611.1 | Chinook salmon |
| MamE          | ZDB-GENE-050302-100  | -                                                                                    | XP_024271107.1 | Chinook salmon |
| MamA          | ZDB-GENE-040426-1599 | microtubule binding motor protein<br>non-receptor serine/threonine<br>protein kinase | XP_024271153.1 | Chinook salmon |
| Mad25         | ZDB-GENE-030115-3    | protein kinase                                                                       | XP_024271173.1 | Chinook salmon |

| uMGH Category | ZFIN gene code       | PANTHER protein class           | Accession      | Fish           |
|---------------|----------------------|---------------------------------|----------------|----------------|
| MamK          | ZDB-GENE-040426-1221 | -                               | XP_024271380.1 | Chinook salmon |
| MamA          | ZDB-GENE-110125-2    | -                               | XP_024271599.1 | Chinook salmon |
| MamE          | ZDB-GENE-030131-8525 | serine protease                 | XP_024271690.1 | Chinook salmon |
| MamA          | ZDB-GENE-040625-34   | chaperone                       | XP_024272178.1 | Chinook salmon |
| MamA          | ZDB-GENE-030131-8173 | primary active transporter      | XP_024272393.1 | Chinook salmon |
| MamB          | ZDB-GENE-040426-1408 | transporter                     | XP_024272617.1 | Chinook salmon |
| MamA          | ZDB-GENE-081104-113  | ubiquitin-protein ligase        | XP_024273077.1 | Chinook salmon |
| MamK          | ZDB-GENE-040426-2695 | actin and actin related protein | XP_024273249.1 | Chinook salmon |
| MamA          | ZDB-GENE-020919-3    | -                               | XP_024273502.1 | Chinook salmon |
| MamN/MamE     | ZDB-GENE-131120-192  | serine protease                 | XP_024273688.1 | Chinook salmon |
| MamN/MamE     | ZDB-GENE-131120-192  | serine protease                 | XP_024273792.1 | Chinook salmon |
| MamE          | ZDB-GENE-060526-377  | cytoskeletal protein            | XP_024273949.1 | Chinook salmon |
| MamE          | ZDB-GENE-030131-9439 | -                               | XP_024274502.1 | Chinook salmon |
| MamA          | ZDB-GENE-030131-3782 | general transcription factor    | XP_024275133.1 | Chinook salmon |
| MamB          | ZDB-GENE-040426-1840 | -                               | XP_024275476.1 | Chinook salmon |
| MamA          | ZDB-GENE-040426-694  | RNA splicing factor             | XP_024275566.1 | Chinook salmon |
| MamK          | ZDB-GENE-040724-72   | actin and actin related protein | XP_024275613.1 | Chinook salmon |
| Man6          | ZDB-GENE-040724-213  | extracellular matrix protein    | XP_024275664.1 | Chinook salmon |
| MamA          | ZDB-GENE-080722-25   | -                               | XP_024275837.1 | Chinook salmon |
| MamA          | ZDB-GENE-041010-223  | -                               | XP_024276298.1 | Chinook salmon |
| MamE          | ZDB-GENE-030616-129  | -                               | XP_024276779.1 | Chinook salmon |
| MamA          | ZDB-GENE-030131-8811 | -                               | XP_024276844.1 | Chinook salmon |
| Mad25         | ZDB-GENE-060503-274  | membrane traffic protein        | XP_024276987.1 | Chinook salmon |
| MamE          | ZDB-GENE-030828-10   | tight junction                  | XP_024277063.1 | Chinook salmon |
| Man6          | ZDB-GENE-060503-341  | histone modifying enzyme        | XP_024277322.1 | Chinook salmon |
| MamA          | ZDB-GENE-040426-1849 | chaperone                       | XP_024277334.1 | Chinook salmon |
| MamE          | ZDB-GENE-030131-9439 | -                               | XP_024277654.1 | Chinook salmon |



| uMGH Category | ZFIN gene code       | PANTHER protein class                   | Accession      | Fish           |
|---------------|----------------------|-----------------------------------------|----------------|----------------|
| Man6          | ZDB-GENE-021226-1    | extracellular matrix protein            | XP_024277800.1 | Chinook salmon |
| MamA          | ZDB-GENE-070705-298  | membrane trafficking regulatory protein | XP_024278281.1 | Chinook salmon |
| MamA          | ZDB-GENE-041014-158  | -                                       | XP_024278416.1 | Chinook salmon |
| MamB          | ZDB-GENE-041014-347  | transporter                             | XP_024278456.1 | Chinook salmon |
| MamA          | ZDB-GENE-070705-298  | membrane trafficking regulatory protein | XP_024278617.1 | Chinook salmon |
| MamA          | ZDB-GENE-030131-8811 | -                                       | XP_024278812.1 | Chinook salmon |
| Mad25         | ZDB-GENE-060503-274  | membrane traffic protein                | XP_024278987.1 | Chinook salmon |
| MamE          | ZDB-GENE-040426-2830 | -                                       | XP_024279006.1 | Chinook salmon |
| MamA          | ZDB-GENE-050208-116  | chaperone                               | XP_024279394.1 | Chinook salmon |
| MamA          | ZDB-GENE-030131-514  | chaperone                               | XP_024279462.1 | Chinook salmon |
| MamA          | ZDB-GENE-050417-158  | -                                       | XP_024279571.1 | Chinook salmon |
| MamA          | ZDB-GENE-041210-299  | protein modifying enzyme                | XP_024279651.1 | Chinook salmon |
| Mad25         | ZDB-GENE-131121-533  | -                                       | XP_024279682.1 | Chinook salmon |
| Mad25/Man6    | ZDB-GENE-021226-2    | extracellular matrix protein            | XP_024279810.1 | Chinook salmon |
| Man6          | ZDB-GENE-021226-1    | extracellular matrix protein            | XP_024279811.1 | Chinook salmon |
| MamK          | ZDB-GENE-041111-251  | GTPase-activating protein               | XP_024279840.1 | Chinook salmon |
| MamK          | ZDB-GENE-040520-4    | actin and actin related protein         | XP_024279885.1 | Chinook salmon |
| MamE          | ZDB-GENE-090313-191  | cytoskeletal protein                    | XP_024280049.1 | Chinook salmon |
| MamA          | ZDB-GENE-050417-350  | microtubule binding motor protein       | XP_024280052.1 | Chinook salmon |
| MamA          | ZDB-GENE-010319-27   | -                                       | XP_024280298.1 | Chinook salmon |
| MamA          | ZDB-GENE-030102-1    | -                                       | XP_024280520.1 | Chinook salmon |
| MamE          | ZDB-GENE-040704-64   | serine protease                         | XP_024280749.1 | Chinook salmon |
| MamE          | ZDB-GENE-030131-8525 | serine protease                         | XP_024280923.1 | Chinook salmon |
| MamE          | ZDB-GENE-030131-3149 | scaffold/adaptor protein                | XP_024280942.1 | Chinook salmon |
| MamA          | ZDB-GENE-051120-15   | -                                       | XP_024280982.1 | Chinook salmon |
| MamK          | ZDB-GENE-040426-2894 | actin and actin related protein         | XP_024280998.1 | Chinook salmon |

| uMGH Category | ZFIN gene code       | PANTHER protein class                                | Accession      | Fish           |
|---------------|----------------------|------------------------------------------------------|----------------|----------------|
| MamA          | ZDB-GENE-081105-56   | chromatin/chromatin-binding, or - regulatory protein | XP_024281352.1 | Chinook salmon |
| Mad17         | ZDB-GENE-030131-5063 | G-protein                                            | XP_024281439.1 | Chinook salmon |
| MamB          | ZDB-GENE-091204-410  | -                                                    | XP_024281956.1 | Chinook salmon |
| MamA          | ZDB-GENE-050417-350  | microtubule binding motor protein                    | XP_024282077.1 | Chinook salmon |
| MamA          | ZDB-GENE-030131-2081 | -                                                    | XP_024282175.1 | Chinook salmon |
| MamE          | ZDB-GENE-080717-1    | C2H2 zinc finger transcription factor                | XP_024282193.1 | Chinook salmon |
| Mad25         | ZDB-GENE-040516-8    | protein-binding activity modulator                   | XP_024282840.1 | Chinook salmon |
| MamE          | ZDB-GENE-040704-64   | serine protease                                      | XP_024283543.1 | Chinook salmon |
| MamA          | ZDB-GENE-081105-56   | chromatin/chromatin-binding, or - regulatory protein | XP_024283947.1 | Chinook salmon |
| Man6          | ZDB-GENE-070615-37   | chromatin/chromatin-binding, or - regulatory protein | XP_024283987.1 | Chinook salmon |
| MamA          | ZDB-GENE-000831-4    | -                                                    | XP_024284062.1 | Chinook salmon |
| MamA          | ZDB-GENE-000831-4    | -                                                    | XP_024284077.1 | Chinook salmon |
| MamK          | ZDB-GENE-000329-3    | actin and actin related protein                      | XP_024284211.1 | Chinook salmon |
| MamB          | ZDB-GENE-040426-1838 | transporter                                          | XP_024284293.1 | Chinook salmon |
| Mad17         | ZDB-GENE-130530-693  | protein modifying enzyme                             | XP_024284401.1 | Chinook salmon |
| Man6          | ZDB-GENE-061103-409  | -                                                    | XP_024284625.1 | Chinook salmon |
| MamA          | ZDB-GENE-051127-17   | -                                                    | XP_024284918.1 | Chinook salmon |
| MamE          | ZDB-GENE-030131-3149 | scaffold/adaptor protein                             | XP_024284986.1 | Chinook salmon |
| Mad9          | ZDB-GENE-050522-131  | oxidoreductase                                       | XP_024285127.1 | Chinook salmon |
| MamA          | ZDB-GENE-040625-34   | chaperone                                            | XP_024285285.1 | Chinook salmon |
| MamE          | ZDB-GENE-030131-6959 | guanyl-nucleotide exchange factor                    | XP_024285287.1 | Chinook salmon |
| MamA          | ZDB-GENE-051120-15   | -                                                    | XP_024285623.1 | Chinook salmon |
| MamA          | ZDB-GENE-070112-1282 | serine protease                                      | XP_024285644.1 | Chinook salmon |
| MamK          | ZDB-GENE-040520-4    | actin and actin related protein                      | XP_024285818.1 | Chinook salmon |
| MamA          | ZDB-GENE-070105-3    | -                                                    | XP_024286076.1 | Chinook salmon |
| MamE          | ZDB-GENE-030616-572  | scaffold/adaptor protein                             | XP_024286214.1 | Chinook salmon |

| uMGH Category | ZFIN gene code       | PANTHER protein class                   | Accession      | Fish           |
|---------------|----------------------|-----------------------------------------|----------------|----------------|
| MamH          | ZDB-GENE-050417-386  | secondary carrier transporter           | XP_024286242.1 | Chinook salmon |
| MamB          | ZDB-GENE-041014-347  | transporter                             | XP_024286295.1 | Chinook salmon |
| MamE          | ZDB-GENE-031006-7    | -                                       | XP_024286992.1 | Chinook salmon |
| MamA          | ZDB-GENE-090313-3    | ubiquitin-protein ligase                | XP_024287685.1 | Chinook salmon |
| MamA          | ZDB-GENE-050302-4    | chaperone                               | XP_024287707.1 | Chinook salmon |
| MamK          | ZDB-GENE-990415-92   | -                                       | XP_024287800.1 | Chinook salmon |
| MamK          | ZDB-GENE-990415-92   | -                                       | XP_024287807.1 | Chinook salmon |
| MamE          | ZDB-GENE-030131-6972 | guanyl-nucleotide exchange factor       | XP_024287983.1 | Chinook salmon |
| MamK          | ZDB-GENE-990415-92   | -                                       | XP_024288068.1 | Chinook salmon |
| MamK          | ZDB-GENE-990415-92   | -                                       | XP_024288075.1 | Chinook salmon |
| MamE          | ZDB-GENE-030131-6972 | guanyl-nucleotide exchange factor       | XP_024288248.1 | Chinook salmon |
| MamA          | ZDB-GENE-041114-80   | -                                       | XP_024288382.1 | Chinook salmon |
| MamA          | ZDB-GENE-990706-2    | ubiquitin-protein ligase                | XP_024288674.1 | Chinook salmon |
| MamK          | ZDB-GENE-110713-1    | -                                       | XP_024288929.1 | Chinook salmon |
| MamA          | ZDB-GENE-040426-2483 | chaperone                               | XP_024288930.1 | Chinook salmon |
| MamA          | ZDB-GENE-030131-5395 | -                                       | XP_024289178.1 | Chinook salmon |
| MamB          | ZDB-GENE-040724-254  | transporter                             | XP_024289677.1 | Chinook salmon |
| MamE          | ZDB-GENE-121019-1    | -                                       | XP_024289695.1 | Chinook salmon |
| MamA          | ZDB-GENE-080208-7    | nucleic acid metabolism protein         | XP_024289723.1 | Chinook salmon |
| MamE          | ZDB-GENE-130530-682  | -                                       | XP_024289739.1 | Chinook salmon |
| Man6          | ZDB-GENE-030131-9823 | extracellular matrix protein            | XP_024290010.1 | Chinook salmon |
| MamE          | ZDB-GENE-040801-245  | serine protease                         | XP_024290137.1 | Chinook salmon |
| MamK          | ZDB-GENE-040520-4    | actin and actin related protein         | XP_024290181.1 | Chinook salmon |
| MamK          | ZDB-GENE-040520-4    | actin and actin related protein         | XP_024290182.1 | Chinook salmon |
| MamK          | ZDB-GENE-041121-7    | actin and actin related protein         | XP_024290301.1 | Chinook salmon |
| MamA          | ZDB-GENE-000831-4    | -                                       | XP_024290415.1 | Chinook salmon |
| MamA          | ZDB-GENE-070705-298  | membrane trafficking regulatory protein | XP_024290798.1 | Chinook salmon |

| uMGH Category | ZFIN gene code       | PANTHER protein class                                                        | Accession      | Fish           |
|---------------|----------------------|------------------------------------------------------------------------------|----------------|----------------|
| MamA          | ZDB-GENE-070912-490  | -                                                                            | XP_024290803.1 | Chinook salmon |
| MamE          | ZDB-GENE-130530-876  | scaffold/adaptor protein                                                     | XP_024291018.1 | Chinook salmon |
| Man6          | ZDB-GENE-021226-3    | extracellular matrix protein non-receptor serine/threonine protein kinase    | XP_024291330.1 | Chinook salmon |
| Mad25         | ZDB-GENE-100712-2    | -                                                                            | XP_024291697.1 | Chinook salmon |
| MamA          | ZDB-GENE-040426-1169 | -                                                                            | XP_024291998.1 | Chinook salmon |
| MamA          | ZDB-GENE-050417-350  | microtubule binding motor protein                                            | XP_024292119.1 | Chinook salmon |
| MamA          | ZDB-GENE-030131-4744 | chaperone                                                                    | XP_024292265.1 | Chinook salmon |
| MamA          | ZDB-GENE-080728-4    | protein modifying enzyme                                                     | XP_024292308.1 | Chinook salmon |
| MamA          | ZDB-GENE-080728-4    | protein modifying enzyme                                                     | XP_024292320.1 | Chinook salmon |
| MamA          | ZDB-GENE-090429-2    | -                                                                            | XP_024292816.1 | Chinook salmon |
| MamK          | ZDB-GENE-040625-35   | actin and actin related protein non-receptor serine/threonine protein kinase | XP_024292865.1 | Chinook salmon |
| Mad25         | ZDB-GENE-030115-3    | -                                                                            | XP_024292898.1 | Chinook salmon |
| MamA          | ZDB-GENE-040426-1599 | microtubule binding motor protein                                            | XP_024292999.1 | Chinook salmon |
| MamK          | ZDB-GENE-040520-4    | actin and actin related protein                                              | XP_024293216.1 | Chinook salmon |
| MamB          | ZDB-GENE-041014-347  | transporter                                                                  | XP_024293297.1 | Chinook salmon |
| MamH          | ZDB-GENE-050417-386  | secondary carrier transporter                                                | XP_024293739.1 | Chinook salmon |
| MamA          | ZDB-GENE-020919-3    | -                                                                            | XP_024294314.1 | Chinook salmon |
| MamE          | ZDB-GENE-070308-4    | actin or actin-binding cytoskeletal protein                                  | XP_024294537.1 | Chinook salmon |
| MamK          | ZDB-GENE-040426-2695 | actin and actin related protein                                              | XP_024294607.1 | Chinook salmon |
| Mad29         | ZDB-GENE-040625-120  | transporter                                                                  | XP_024295385.1 | Chinook salmon |
| MamE          | ZDB-GENE-031001-2    | tight junction                                                               | XP_024295795.1 | Chinook salmon |
| MamA          | ZDB-GENE-030131-3782 | general transcription factor                                                 | XP_024295928.1 | Chinook salmon |
| MamA          | ZDB-GENE-060126-2    | -                                                                            | XP_024296284.1 | Chinook salmon |
| MamE          | ZDB-GENE-060526-377  | cytoskeletal protein                                                         | XP_024296314.1 | Chinook salmon |
| MamA          | ZDB-GENE-081104-113  | ubiquitin-protein ligase                                                     | XP_024296461.1 | Chinook salmon |
| MamA          | ZDB-GENE-100422-15   | -                                                                            | XP_024296581.1 | Chinook salmon |
| MamH          | ZDB-GENE-030131-2165 | DNA-binding transcription factor                                             | XP_024296711.1 | Chinook salmon |

| uMGH Category  | ZFIN gene code       | PANTHER protein class                           | Accession              | Fish           |
|----------------|----------------------|-------------------------------------------------|------------------------|----------------|
| MamA           | ZDB-GENE-071016-4    | -                                               | XP_024297837.1         | Chinook salmon |
| Mad25          | ZDB-GENE-141215-28   | membrane traffic protein                        | XP_024298089.1         | Chinook salmon |
| MamK           | ZDB-GENE-040520-4    | actin and actin related protein                 | XP_024298139.1         | Chinook salmon |
| MamA           | ZDB-GENE-060929-772  | microtubule binding motor protein               | XP_024298228.1         | Chinook salmon |
| MamK           | ZDB-GENE-040426-2894 | actin and actin related protein                 | XP_024298298.1         | Chinook salmon |
| Man6           | ZDB-GENE-121114-8    | -                                               | XP_024298417.1         | Chinook salmon |
| MamN           | ZDB-GENE-030131-4628 | secondary carrier transporter                   | XP_024298672.1         | Chinook salmon |
| MamK           | ZDB-GENE-990415-92   | -                                               | XP_024298732.1         | Chinook salmon |
| MamA           | ZDB-GENE-050417-350  | microtubule binding motor protein               | XP_024299050.1         | Chinook salmon |
| MamA           | ZDB-GENE-050327-75   | protein phosphatase                             | XP_024299096.1         | Chinook salmon |
| Mad17          | ZDB-GENE-030131-5063 | G-protein                                       | XP_024299617.1         | Chinook salmon |
| MamE           | ZDB-GENE-060503-371  | scaffold/adaptor protein                        | XP_024300068.1         | Chinook salmon |
| MamA           | ZDB-GENE-030131-2081 | -                                               | XP_024300141.1         | Chinook salmon |
| MamA           | ZDB-GENE-050419-67   | chaperone                                       | XP_024300276.1         | Chinook salmon |
| MamA           | ZDB-GENE-060929-772  | microtubule binding motor protein               | XP_024300555.1         | Chinook salmon |
| MamK           | ZDB-GENE-070410-58   | -                                               | XP_024301220.1         | Chinook salmon |
| MamE           | ZDB-GENE-031006-7    | -                                               | ENSDARG00000000068.9   | Zebrafish      |
| MamE           | ZDB-GENE-030616-572  | scaffold/adaptor protein                        | ENSDARG000000000861.13 | Zebrafish      |
| MamA           | ZDB-GENE-030131-2081 | -                                               | ENSDARG00000001557.9   | Zebrafish      |
| MamA           | ZDB-GENE-040426-1849 | chaperone                                       | ENSDARG00000001734.10  | Zebrafish      |
| MamA           | ZDB-GENE-050208-116  | chaperone                                       | ENSDARG00000001976.9   | Zebrafish      |
| Mad25/M<br>an6 | ZDB-GENE-081030-4    | extracellular matrix protein                    | ENSDARG00000002084.11  | Zebrafish      |
| MamE           | ZDB-GENE-030828-10   | tight junction                                  | ENSDARG00000002909.11  | Zebrafish      |
| MamK           | ZDB-GENE-030828-12   | -                                               | ENSDARG00000003035.10  | Zebrafish      |
| MamA           | ZDB-GENE-030131-9443 | -                                               | ENSDARG00000004017.10  | Zebrafish      |
| MamK           | ZDB-GENE-041121-7    | actin and actin related protein                 | ENSDARG00000004658.9   | Zebrafish      |
| Mad25          | ZDB-GENE-060125-2    | non-receptor serine/threonine<br>protein kinase | ENSDARG00000004877.14  | Zebrafish      |

| uMGH Category | ZFIN gene code       | PANTHER protein class                        | Accession             | Fish      |
|---------------|----------------------|----------------------------------------------|-----------------------|-----------|
| MamA          | ZDB-GENE-041121-17   | -                                            | ENSDARG00000004906.9  | Zebrafish |
| MamE          | ZDB-GENE-030219-74   | -                                            | ENSDARG00000004930.11 | Zebrafish |
| MamB          | ZDB-GENE-040426-1840 | -                                            | ENSDARG00000005463.6  | Zebrafish |
| MamE          | ZDB-GENE-030131-6959 | guanyl-nucleotide exchange factor            | ENSDARG00000005482.9  | Zebrafish |
| MamA          | ZDB-GENE-070209-29   | protein-binding activity modulator           | ENSDARG00000005821.11 | Zebrafish |
| MamN/MamE     | ZDB-GENE-131120-192  | serine protease                              | ENSDARG00000005943.10 | Zebrafish |
| MamE          | ZDB-GENE-030131-431  | protease                                     | ENSDARG00000006300.9  | Zebrafish |
| MamB          | ZDB-GENE-040426-1408 | transporter                                  | ENSDARG00000007180.9  | Zebrafish |
| MamA          | ZDB-GENE-121214-248  | -                                            | ENSDARG00000007467.10 | Zebrafish |
| MamA          | ZDB-GENE-040426-694  | RNA splicing factor                          | ENSDARG00000007901.9  | Zebrafish |
| MamA          | ZDB-GENE-030102-1    | -                                            | ENSDARG00000007918.12 | Zebrafish |
| MamA          | ZDB-GENE-121214-233  | -                                            | ENSDARG00000008098.9  | Zebrafish |
| MamA          | ZDB-GENE-030131-514  | chaperone                                    | ENSDARG00000008447.11 | Zebrafish |
| MamA          | ZDB-GENE-030131-3782 | general transcription factor                 | ENSDARG00000009170.10 | Zebrafish |
| MamA          | ZDB-GENE-040426-1599 | microtubule binding motor protein            | ENSDARG00000009796.11 | Zebrafish |
| MamE          | ZDB-GENE-030131-6972 | guanyl-nucleotide exchange factor            | ENSDARG00000010945.9  | Zebrafish |
| MamK          | ZDB-GENE-040426-2695 | actin and actin related protein              | ENSDARG00000011611.10 | Zebrafish |
| MamH          | ZDB-GENE-020228-1    | transporter                                  | ENSDARG00000011925.9  | Zebrafish |
| MamA          | ZDB-GENE-031010-34   | -                                            | ENSDARG00000012368.13 | Zebrafish |
| MamK          | ZDB-GENE-040426-1221 | -                                            | ENSDARG00000012381.9  | Zebrafish |
| MamE          | ZDB-GENE-030131-3727 | membrane trafficking regulatory protein      | ENSDARG00000012513.7  | Zebrafish |
| MamE          | ZDB-GENE-080219-7    | serine protease                              | ENSDARG00000014907.8  | Zebrafish |
| MamE          | ZDB-GENE-041210-125  | -                                            | ENSDARG00000015053.10 | Zebrafish |
| MamA          | ZDB-GENE-040704-72   | -                                            | ENSDARG00000016769.11 | Zebrafish |
| MamA          | ZDB-GENE-040426-1169 | -                                            | ENSDARG00000017311.11 | Zebrafish |
| Mad25         | ZDB-GENE-030115-3    | non-receptor serine/threonine protein kinase | ENSDARG00000017500.12 | Zebrafish |
| MamA          | ZDB-GENE-000831-4    | -                                            | ENSDARG00000017874.11 | Zebrafish |

| uMGH Category | ZFIN gene code       | PANTHER protein class                                                 | Accession             | Fish      |
|---------------|----------------------|-----------------------------------------------------------------------|-----------------------|-----------|
| Mad29         | ZDB-GENE-040625-120  | transporter                                                           | ENSDARG00000018190.10 | Zebrafish |
| MamA          | ZDB-GENE-030131-8811 | -                                                                     | ENSDARG00000019941.8  | Zebrafish |
| MamB          | ZDB-GENE-030131-5650 | -                                                                     | ENSDARG00000019998.9  | Zebrafish |
| MamA          | ZDB-GENE-070912-148  | -                                                                     | ENSDARG00000020447.11 | Zebrafish |
| Man6          | ZDB-GENE-040426-809  | scaffold/adaptor protein                                              | ENSDARG00000020764.9  | Zebrafish |
| Man6          | ZDB-GENE-040724-213  | extracellular matrix protein                                          | ENSDARG00000020785.10 | Zebrafish |
| MamB          | ZDB-GENE-041014-347  | transporter                                                           | ENSDARG00000021305.12 | Zebrafish |
| MamK          | ZDB-GENE-110713-1    | -                                                                     | ENSDARG00000021924.9  | Zebrafish |
| MamA          | ZDB-GENE-030131-5395 | -                                                                     | ENSDARG00000021973.8  | Zebrafish |
| MamE          | ZDB-GENE-031222-1    | -                                                                     | ENSDARG00000022261.9  | Zebrafish |
| MamA          | ZDB-GENE-070705-298  | membrane trafficking regulatory protein                               | ENSDARG00000022518.11 | Zebrafish |
| MamE          | ZDB-GENE-040718-58   | tight junction                                                        | ENSDARG00000023443.10 | Zebrafish |
| MamE          | ZDB-GENE-030616-129  | -                                                                     | ENSDARG00000024964.9  | Zebrafish |
| MamE          | ZDB-GENE-081031-78   | -                                                                     | ENSDARG00000026840.11 | Zebrafish |
| MamA          | ZDB-GENE-030131-574  | -                                                                     | ENSDARG00000027234.11 | Zebrafish |
| MamE          | ZDB-GENE-070705-172  | -                                                                     | ENSDARG00000027618.12 | Zebrafish |
| MamA          | ZDB-GENE-030616-630  | chaperone                                                             | ENSDARG00000028396.5  | Zebrafish |
| MamA          | ZDB-GENE-030131-8173 | primary active transporter<br>membrane trafficking regulatory protein | ENSDARG00000029639.8  | Zebrafish |
| MamE          | ZDB-GENE-081104-57   | -                                                                     | ENSDARG00000030097.7  | Zebrafish |
| MamA          | ZDB-GENE-050302-4    | chaperone                                                             | ENSDARG00000030133.7  | Zebrafish |
| MamE          | ZDB-GENE-040704-64   | serine protease                                                       | ENSDARG00000032831.6  | Zebrafish |
| Man6          | ZDB-GENE-030131-4205 | extracellular matrix protein                                          | ENSDARG00000033950.9  | Zebrafish |
| MamA          | ZDB-GENE-050327-75   | protein phosphatase                                                   | ENSDARG00000034313.9  | Zebrafish |
| MamA          | ZDB-GENE-081031-100  | protein modifying enzyme                                              | ENSDARG00000035273.8  | Zebrafish |
| MamA          | ZDB-GENE-040718-480  | -                                                                     | ENSDARG00000035406.5  | Zebrafish |
| Man6          | ZDB-GENE-021226-3    | extracellular matrix protein                                          | ENSDARG00000036279.6  | Zebrafish |
| MamK          | ZDB-GENE-050417-267  | actin and actin related protein                                       | ENSDARG00000036371.5  | Zebrafish |

| uMGH Category  | ZFIN gene code       | PANTHER protein class           | Accession             | Fish      |
|----------------|----------------------|---------------------------------|-----------------------|-----------|
| MamK           | ZDB-GENE-121214-31   | -                               | ENSDARG00000037403.6  | Zebrafish |
| MamK           | ZDB-GENE-000329-1    | actin and actin related protein | ENSDARG00000037746.7  | Zebrafish |
| MamK           | ZDB-GENE-000329-3    | actin and actin related protein | ENSDARG00000037870.6  | Zebrafish |
| MamA           | ZDB-GENE-040625-34   | chaperone                       | ENSDARG00000038835.7  | Zebrafish |
| MamA           | ZDB-GENE-051120-15   | -                               | ENSDARG00000039082.9  | Zebrafish |
| Mad25/M<br>an6 | ZDB-GENE-021226-2    | extracellular matrix protein    | ENSDARG00000039133.8  | Zebrafish |
| MamA           | ZDB-GENE-030131-5511 | chaperone                       | ENSDARG00000039208.9  | Zebrafish |
| Mad17          | ZDB-GENE-030131-8767 | -                               | ENSDARG00000039345.6  | Zebrafish |
| Mad17          | ZDB-GENE-040718-153  | -                               | ENSDARG00000040300.6  | Zebrafish |
| MamN/M<br>amE  | ZDB-GENE-080430-1    | -                               | ENSDARG00000040568.5  | Zebrafish |
| MamK           | ZDB-GENE-070410-58   | -                               | ENSDARG00000040984.7  | Zebrafish |
| MamA           | ZDB-GENE-030131-1264 | -                               | ENSDARG00000041110.4  | Zebrafish |
| MamK           | ZDB-GENE-040520-4    | actin and actin related protein | ENSDARG00000042535.5  | Zebrafish |
| Mad25          | ZDB-GENE-060503-274  | membrane traffic protein        | ENSDARG00000042670.10 | Zebrafish |
| MamE           | ZDB-GENE-060421-4490 | secondary carrier transporter   | ENSDARG00000042737.7  | Zebrafish |
| MamH           | ZDB-GENE-081021-1    | secondary carrier transporter   | ENSDARG00000042954.8  | Zebrafish |
| MamA           | ZDB-GENE-040914-80   | general transcription factor    | ENSDARG00000043247.6  | Zebrafish |
| MamE           | ZDB-GENE-030131-9439 | -                               | ENSDARG00000043323.9  | Zebrafish |
| MamK           | ZDB-GENE-040724-72   | actin and actin related protein | ENSDARG00000043963.8  | Zebrafish |
| MamH           | ZDB-GENE-050417-386  | secondary carrier transporter   | ENSDARG00000044047.7  | Zebrafish |
| MamA           | ZDB-GENE-040426-866  | ubiquitin-protein ligase        | ENSDARG00000044484.5  | Zebrafish |
| Mad17          | ZDB-GENE-030131-5063 | G-protein                       | ENSDARG00000044565.8  | Zebrafish |
| MamA           | ZDB-GENE-100422-15   | -                               | ENSDARG00000044812.8  | Zebrafish |
| MamK           | ZDB-GENE-030131-1229 | actin and actin related protein | ENSDARG00000045180.9  | Zebrafish |
| MamA           | ZDB-GENE-030131-2963 | ubiquitin-protein ligase        | ENSDARG00000045228.8  | Zebrafish |
| Mad25/M<br>an6 | ZDB-GENE-041210-197  | extracellular matrix protein    | ENSDARG00000045524.7  | Zebrafish |
| MamE           | ZDB-GENE-041014-2    | serine protease                 | ENSDARG00000045544.7  | Zebrafish |



| uMGH Category | ZFIN gene code       | PANTHER protein class             | Accession            | Fish      |
|---------------|----------------------|-----------------------------------|----------------------|-----------|
| MamE          | ZDB-GENE-041210-237  | -                                 | ENSDARG00000045687.7 | Zebrafish |
| MamA          | ZDB-GENE-041210-299  | protein modifying enzyme          | ENSDARG00000045753.6 | Zebrafish |
| MamB          | ZDB-GENE-040718-6    | -                                 | ENSDARG00000051921.4 | Zebrafish |
| Mad9          | ZDB-GENE-040426-2153 | oxidoreductase                    | ENSDARG00000051986.4 | Zebrafish |
| MamE          | ZDB-GENE-000329-5    | oxidase                           | ENSDARG00000052139.8 | Zebrafish |
| MamH          | ZDB-GENE-051120-165  | secondary carrier transporter     | ENSDARG00000052271.8 | Zebrafish |
| MamK          | ZDB-GENE-040426-2894 | actin and actin related protein   | ENSDARG00000052438.6 | Zebrafish |
| MamE          | ZDB-GENE-040801-245  | serine protease                   | ENSDARG00000052895.9 | Zebrafish |
| MamE          | ZDB-GENE-040426-2544 | cell junction protein             | ENSDARG00000053194.7 | Zebrafish |
| Mad25         | ZDB-GENE-080204-113  | -                                 | ENSDARG00000053201.7 | Zebrafish |
| MamE          | ZDB-GENE-060825-242  | -                                 | ENSDARG00000053535.8 | Zebrafish |
| MamB          | ZDB-GENE-070424-43   | -                                 | ENSDARG00000053896.6 | Zebrafish |
| Mad29         | ZDB-GENE-040718-140  | -                                 | ENSDARG00000054821.6 | Zebrafish |
| MamH          | ZDB-GENE-060929-1158 | secondary carrier transporter     | ENSDARG00000055190.6 | Zebrafish |
| MamA          | ZDB-GENE-051113-132  | ubiquitin-protein ligase          | ENSDARG00000055470.6 | Zebrafish |
| Mad29         | ZDB-GENE-050417-471  | -                                 | ENSDARG00000055472.7 | Zebrafish |
| MamK          | ZDB-GENE-030131-55   | actin and actin related protein   | ENSDARG00000055618.5 | Zebrafish |
| Mad29         | ZDB-GENE-051023-10   | -                                 | ENSDARG00000055653.7 | Zebrafish |
| MamE          | ZDB-GENE-081022-151  | -                                 | ENSDARG00000055656.4 | Zebrafish |
| MamK          | ZDB-GENE-050321-1    | -                                 | ENSDARG00000055723.6 | Zebrafish |
| MamA          | ZDB-GENE-060929-772  | microtubule binding motor protein | ENSDARG00000055965.6 | Zebrafish |
| MamK          | ZDB-GENE-060503-867  | -                                 | ENSDARG00000056210.7 | Zebrafish |
| MamA          | ZDB-GENE-990706-2    | ubiquitin-protein ligase          | ENSDARG00000056258.8 | Zebrafish |
| MamA          | ZDB-GENE-071016-4    | -                                 | ENSDARG00000056896.6 | Zebrafish |
| Mad9          | ZDB-GENE-050522-131  | oxidoreductase                    | ENSDARG00000057055.9 | Zebrafish |
| MamA          | ZDB-GENE-051127-17   | -                                 | ENSDARG00000057173.4 | Zebrafish |
| MamB          | ZDB-GENE-040724-254  | transporter                       | ENSDARG00000057272.8 | Zebrafish |

| uMGH Category | ZFIN gene code       | PANTHER protein class                                   | Accession            | Fish      |
|---------------|----------------------|---------------------------------------------------------|----------------------|-----------|
| MamA          | ZDB-GENE-030131-2527 | -                                                       | ENSDARG00000057890.7 | Zebrafish |
| MamK          | ZDB-GENE-040625-35   | actin and actin related protein                         | ENSDARG00000057911.7 | Zebrafish |
| Man6          | ZDB-GENE-030131-3404 | -                                                       | ENSDARG00000057918.7 | Zebrafish |
| MamA          | ZDB-GENE-050522-556  | -                                                       | ENSDARG00000057986.8 | Zebrafish |
| Mad25         | ZDB-GENE-040801-25   | -                                                       | ENSDARG00000057997.6 | Zebrafish |
| MamA          | ZDB-GENE-040426-995  | -                                                       | ENSDARG00000058140.5 | Zebrafish |
| MamA          | ZDB-GENE-040426-2483 | chaperone                                               | ENSDARG00000058148.8 | Zebrafish |
| MamA          | ZDB-GENE-091204-50   | structural protein                                      | ENSDARG00000058508.8 | Zebrafish |
| Man6          | ZDB-GENE-030131-9823 | extracellular matrix protein                            | ENSDARG00000058543.6 | Zebrafish |
| Man6          | ZDB-GENE-070705-287  | DNA metabolism protein                                  | ENSDARG00000058719.9 | Zebrafish |
| MamH          | ZDB-GENE-080204-92   | secondary carrier transporter                           | ENSDARG00000058775.6 | Zebrafish |
| MamA          | ZDB-GENE-100922-181  | -                                                       | ENSDARG00000058885.7 | Zebrafish |
| MamN          | ZDB-GENE-070424-71   | secondary carrier transporter                           | ENSDARG00000059053.8 | Zebrafish |
| MamE          | ZDB-GENE-040426-2830 | -                                                       | ENSDARG00000059177.5 | Zebrafish |
| MamE          | ZDB-GENE-130530-682  | -                                                       | ENSDARG00000059567.7 | Zebrafish |
| MamA          | ZDB-GENE-070112-2002 | chromatin/chromatin-binding, or -<br>regulatory protein | ENSDARG00000059794.7 | Zebrafish |
| Mad17         | ZDB-GENE-060526-84   | RNA metabolism protein                                  | ENSDARG00000059887.6 | Zebrafish |
| MamA          | ZDB-GENE-070112-1282 | serine protease                                         | ENSDARG00000060101.8 | Zebrafish |
| MamA          | ZDB-GENE-070105-3    | -                                                       | ENSDARG00000061207.8 | Zebrafish |
| MamB          | ZDB-GENE-060929-448  | -                                                       | ENSDARG00000061216.6 | Zebrafish |
| MamN          | ZDB-GENE-070718-4    | primary active transporter                              | ENSDARG00000061303.8 | Zebrafish |
| MamE          | ZDB-GENE-090313-280  | guanyl-nucleotide exchange factor                       | ENSDARG00000061459.7 | Zebrafish |
| MamE          | ZDB-GENE-140106-76   | -                                                       | ENSDARG00000061717.6 | Zebrafish |
| MamA          | ZDB-GENE-081105-56   | chromatin/chromatin-binding, or<br>regulatory protein   | ENSDARG00000061759.9 | Zebrafish |
| MamH          | ZDB-GENE-131120-103  | secondary carrier transporter                           | ENSDARG00000062182.6 | Zebrafish |
| MamA          | ZDB-GENE-061221-2    | -                                                       | ENSDARG00000062846.7 | Zebrafish |
| MamA          | ZDB-GENE-081104-113  | ubiquitin-protein ligase                                | ENSDARG00000063005.7 | Zebrafish |

| uMGH Category | ZFIN gene code       | PANTHER protein class                       | Accession            | Fish      |
|---------------|----------------------|---------------------------------------------|----------------------|-----------|
| MamA          | ZDB-GENE-070705-219  | -                                           | ENSDARG00000063149.9 | Zebrafish |
| MamA          | ZDB-GENE-080722-25   | -                                           | ENSDARG00000063242.6 | Zebrafish |
| MamA          | ZDB-GENE-060126-2    | -                                           | ENSDARG00000063522.7 | Zebrafish |
| MamE          | ZDB-GENE-060526-377  | cytoskeletal protein                        | ENSDARG00000068166.6 | Zebrafish |
| MamA          | ZDB-GENE-050419-67   | chaperone                                   | ENSDARG00000068421.4 | Zebrafish |
| MamK          | ZDB-GENE-990415-92   | -                                           | ENSDARG00000068992.5 | Zebrafish |
| MamE          | ZDB-GENE-081028-30   | serine protease                             | ENSDARG00000069909.7 | Zebrafish |
| MamE          | ZDB-GENE-070308-4    | actin or actin-binding cytoskeletal protein | ENSDARG00000069956.7 | Zebrafish |
| MamK          | ZDB-GENE-050410-4    | actin and actin related protein             | ENSDARG00000070076.6 | Zebrafish |
| MamE          | ZDB-GENE-091113-21   | serine protease                             | ENSDARG00000070138.6 | Zebrafish |
| MamH          | ZDB-GENE-030131-2165 | DNA-binding transcription factor            | ENSDARG00000070151.8 | Zebrafish |
| MamA          | ZDB-GENE-040426-981  | membrane trafficking regulatory protein     | ENSDARG00000070654.6 | Zebrafish |
| MamA          | ZDB-GENE-041111-230  | -                                           | ENSDARG00000071294.5 | Zebrafish |
| MamE          | ZDB-GENE-030131-3149 | scaffold/adaptor protein                    | ENSDARG00000074059.6 | Zebrafish |
| MamA          | ZDB-GENE-110125-2    | -                                           | ENSDARG00000074314.5 | Zebrafish |
| MamA          | ZDB-GENE-090312-172  | chaperone                                   | ENSDARG00000074363.5 | Zebrafish |
| MamA          | ZDB-GENE-111221-1    | membrane trafficking regulatory protein     | ENSDARG00000074403.5 | Zebrafish |
| MamA          | ZDB-GENE-010319-27   | -                                           | ENSDARG00000074760.5 | Zebrafish |
| MamE          | ZDB-GENE-030131-8525 | serine protease                             | ENSDARG00000074895.5 | Zebrafish |
| MamA          | ZDB-GENE-101021-4    | ubiquitin-protein ligase                    | ENSDARG00000075048.6 | Zebrafish |
| MamE          | ZDB-GENE-090313-90   | protein phosphatase                         | ENSDARG00000075459.5 | Zebrafish |
| MamA          | ZDB-GENE-081107-12   | ubiquitin-protein ligase                    | ENSDARG00000075687.5 | Zebrafish |
| MamN/M<br>amE | ZDB-GENE-091113-42   | -                                           | ENSDARG00000076103.6 | Zebrafish |
| MamK          | ZDB-GENE-040520-4    | actin and actin related protein             | ENSDARG00000076126.4 | Zebrafish |
| MamE          | ZDB-GENE-090313-191  | cytoskeletal protein                        | ENSDARG00000076974.5 | Zebrafish |
| MamB          | ZDB-GENE-040426-1838 | transporter                                 | ENSDARG00000077368.5 | Zebrafish |

| uMGH Category | ZFIN gene code       | PANTHER protein class         | Accession            | Fish      |
|---------------|----------------------|-------------------------------|----------------------|-----------|
| MamE          | ZDB-GENE-031001-2    | tight junction                | ENSDARG00000077506.8 | Zebrafish |
| MamK          | ZDB-GENE-070522-2    | -                             | ENSDARG00000077866.5 | Zebrafish |
| Mad25         | ZDB-GENE-081104-264  | membrane traffic protein      | ENSDARG00000078216.5 | Zebrafish |
| MamA          | ZDB-GENE-091204-117  | -                             | ENSDARG00000078261.7 | Zebrafish |
| MamA          | ZDB-GENE-120727-22   | protein modifying enzyme      | ENSDARG00000078703.4 | Zebrafish |
| MamA          | ZDB-GENE-060130-180  | -                             | ENSDARG00000079097.6 | Zebrafish |
| MamE          | ZDB-GENE-070925-1    | tight junction                | ENSDARG00000079374.8 | Zebrafish |
| MamE          | ZDB-GENE-130530-876  | scaffold/adaptor protein      | ENSDARG00000079670.5 | Zebrafish |
| MamE          | ZDB-GENE-121214-224  | -                             | ENSDARG00000079791.5 | Zebrafish |
| MamA          | ZDB-GENE-090313-3    | ubiquitin-protein ligase      | ENSDARG00000086075.4 | Zebrafish |
| MamH          | ZDB-GENE-030131-7188 | secondary carrier transporter | ENSDARG00000086739.3 | Zebrafish |
| MamE          | ZDB-GENE-081104-132  | -                             | ENSDARG00000087187.5 | Zebrafish |
| MamA          | ZDB-GENE-040426-928  | -                             | ENSDARG00000087962.4 | Zebrafish |
| MamB          | ZDB-GENE-091204-410  | -                             | ENSDARG00000088227.4 | Zebrafish |
| MamE          | ZDB-GENE-080215-8    | serine protease               | ENSDARG00000088743.3 | Zebrafish |
| MamA          | ZDB-GENE-130530-956  | -                             | ENSDARG00000089190.3 | Zebrafish |
| MamA          | ZDB-GENE-121214-302  | -                             | ENSDARG00000090537.3 | Zebrafish |
| MamN/MamE     | ZDB-GENE-090313-136  | -                             | ENSDARG00000090564.4 | Zebrafish |
| MamA          | ZDB-GENE-120406-2    | -                             | ENSDARG00000090977.4 | Zebrafish |
| MamE          | ZDB-GENE-081028-21   | serine protease               | ENSDARG00000092061.3 | Zebrafish |
| MamE          | ZDB-GENE-081028-22   | serine protease               | ENSDARG00000092094.4 | Zebrafish |
| MamE          | ZDB-GENE-091113-30   | serine protease               | ENSDARG00000092133.3 | Zebrafish |
| MamE          | ZDB-GENE-141219-11   | serine protease               | ENSDARG00000092202.3 | Zebrafish |
| MamK          | ZDB-GENE-110405-1    | -                             | ENSDARG00000092362.4 | Zebrafish |
| MamE          | ZDB-GENE-081028-18   | serine protease               | ENSDARG00000092380.3 | Zebrafish |
| MamE          | ZDB-GENE-081028-29   | serine protease               | ENSDARG00000093005.3 | Zebrafish |
| MamA          | ZDB-GENE-081104-93   | scaffold/adaptor protein      | ENSDARG00000093125.5 | Zebrafish |

| uMGH Category  | ZFIN gene code       | PANTHER protein class                                              | Accession            | Fish      |
|----------------|----------------------|--------------------------------------------------------------------|----------------------|-----------|
| MamN/M<br>amE  | ZDB-GENE-081028-43   | serine protease                                                    | ENSDARG00000094236.3 | Zebrafish |
| MamE           | ZDB-GENE-081028-27   | serine protease                                                    | ENSDARG00000094403.3 | Zebrafish |
| MamE           | ZDB-GENE-081104-136  | -                                                                  | ENSDARG00000094605.2 | Zebrafish |
| MamE           | ZDB-GENE-071004-51   | serine protease                                                    | ENSDARG00000094741.3 | Zebrafish |
| MamE           | ZDB-GENE-091113-19   | serine protease                                                    | ENSDARG00000094749.3 | Zebrafish |
| MamE           | ZDB-GENE-091112-23   | serine protease                                                    | ENSDARG00000094878.3 | Zebrafish |
| MamE           | ZDB-GENE-091113-31   | serine protease                                                    | ENSDARG00000094995.3 | Zebrafish |
| MamE           | ZDB-GENE-081028-23   | serine protease                                                    | ENSDARG00000095314.3 | Zebrafish |
| MamA           | ZDB-GENE-030131-4744 | chaperone                                                          | ENSDARG00000095322.4 | Zebrafish |
| MamE           | ZDB-GENE-081028-30   | serine protease                                                    | ENSDARG00000095545.3 | Zebrafish |
| MamN/M<br>amE  | ZDB-GENE-040724-161  | -                                                                  | ENSDARG00000095603.4 | Zebrafish |
| MamE           | ZDB-GENE-091113-30   | serine protease<br>non-receptor serine/threonine<br>protein kinase | ENSDARG00000095687.3 | Zebrafish |
| MamA           | ZDB-GENE-120215-5    | -                                                                  | ENSDARG00000096423.3 | Zebrafish |
| MamK           | ZDB-GENE-040426-2877 | actin and actin related protein                                    | ENSDARG00000098235.2 | Zebrafish |
| MamA           | ZDB-GENE-030131-4512 | nucleic acid metabolism protein                                    | ENSDARG00000098540.3 | Zebrafish |
| MamE           | ZDB-GENE-030131-1791 | general transcription factor                                       | ENSDARG00000098822.2 | Zebrafish |
| MamK           | ZDB-GENE-000322-1    | actin and actin related protein                                    | ENSDARG00000099197.3 | Zebrafish |
| MamA           | ZDB-GENE-030131-9631 | protein modifying enzyme                                           | ENSDARG00000099455.2 | Zebrafish |
| MamB           | ZDB-GENE-060315-10   | transporter                                                        | ENSDARG00000100917.2 | Zebrafish |
| Man6           | ZDB-GENE-021226-1    | extracellular matrix protein                                       | ENSDARG00000101209.3 | Zebrafish |
| MamA           | ZDB-GENE-041010-223  | -                                                                  | ENSDARG00000102026.2 | Zebrafish |
| Mad25/M<br>an6 | ZDB-GENE-060118-1    | extracellular matrix protein                                       | ENSDARG00000102277.2 | Zebrafish |
| MamA           | ZDB-GENE-050417-158  | -                                                                  | ENSDARG00000103643.3 | Zebrafish |
| MamE           | ZDB-GENE-070410-72   | protein phosphatase                                                | ENSDARG00000103699.3 | Zebrafish |
| MamK           | ZDB-GENE-031001-11   | -                                                                  | ENSDARG00000103846.3 | Zebrafish |
| MamB           | ZDB-GENE-060608-2    | -                                                                  | ENSDARG00000103983.2 | Zebrafish |

| uMGH Category | ZFIN gene code       | PANTHER protein class           | Accession            | Fish      |
|---------------|----------------------|---------------------------------|----------------------|-----------|
| MamA          | ZDB-GENE-141219-15   | -                               | ENSDARG00000104035.2 | Zebrafish |
| MamA          | ZDB-GENE-090429-2    | -                               | ENSDARG00000104125.2 | Zebrafish |
| MamA          | ZDB-GENE-030131-9631 | protein modifying enzyme        | ENSDARG00000105243.2 | Zebrafish |
| MamA          | ZDB-GENE-091204-50   | structural protein              | ENSDARG00000109449.1 | Zebrafish |
| MamA          | ZDB-GENE-030131-2527 | -                               | ENSDARG00000109553.1 | Zebrafish |
| MamE          | ZDB-GENE-090313-191  | cytoskeletal protein            | ENSDARG00000109814.1 | Zebrafish |
| MamK          | ZDB-GENE-040625-35   | actin and actin related protein | ENSDARG00000110511.1 | Zebrafish |
| MamA          | ZDB-GENE-081031-100  | protein modifying enzyme        | ENSDARG00000110747.1 | Zebrafish |
| Man6          | ZDB-GENE-030131-731  | -                               | ENSDARG00000111088.1 | Zebrafish |
| MamK          | ZDB-GENE-040625-35   | actin and actin related protein | ENSDARG00000111417.1 | Zebrafish |
| MamE          | ZDB-GENE-081028-23   | serine protease                 | ENSDARG00000111633.1 | Zebrafish |
| MamH          | ZDB-GENE-020228-1    | transporter                     | ENSDARG00000111727.1 | Zebrafish |
| MamE          | ZDB-GENE-091113-30   | serine protease                 | ENSDARG00000111992.1 | Zebrafish |
| MamA          | ZDB-GENE-030131-8173 | primary active transporter      | ENSDARG00000112054.1 | Zebrafish |
| MamA          | ZDB-GENE-040426-1169 | -                               | ENSDARG00000113810.1 | Zebrafish |
| MamK          | ZDB-GENE-990415-92   | -                               | ENSDARG00000114726.1 | Zebrafish |
| MamE          | ZDB-GENE-081028-32   | serine protease                 | ENSDARG00000115120.1 | Zebrafish |
| MamE          | ZDB-GENE-040426-2544 | cell junction protein           | ENSDARG00000116591.1 | Zebrafish |
| MamK          | ZDB-GENE-040520-4    | actin and actin related protein | ENSDARG00000116925.1 | Zebrafish |
